# Supplementary material for: Retrospective analysis of 2015–2017 winter-time PM 2.5 in China: response to emission regulations and the role of meteorology
Source: Copernicus journal article supplement (doi:10.5194/acp-2018-890), 2018-10-19
Supplement: Supplementary file [file acp-2018-890-AC1-supplement.pdf]

---

## COMMENTS TO THE AUTHOR(S)

Retrospective analysis of 2015-2017 winter-time PM<sub>2.5</sub> in China: response to emission regulations and the role of meteorology

Manuscript ID: acp-2018-890

Authors: Chen, et al.

### Reviewer 1

This manuscript presents an interesting study that utilizes the GSI-WRF/Chem 3D-variational data assimilation system to better simulate the surface PM<sub>2.5</sub> concentrations in China for the January months 2015-2017. It shows that WRF-Chem PM<sub>2.5</sub> simulations with assimilation of surface measurements significantly reduced the model biases and better captured the inter-annual variability of surface PM<sub>2.5</sub> levels in January 2015-2017. The model improvements are independently evaluated with MODIS and AERONET aerosol optical depth (AOD) measurements. Comparisons of model PM<sub>2.5</sub> simulations with and without data assimilation indicate the effectiveness of the emission control measures, as well as the unfavorable meteorological conditions in January 2017 that led to PM<sub>2.5</sub> increases relative to January 2016.

Overall, I think this is a nice study that illustrates the strength of data assimilation method to constrain PM<sub>2.5</sub> changes, and further diagnoses contributions from both emissions and meteorological conditions. The method of this study is solid, and the language is generally appropriate. I recommend publish after the following comments being addressed.

### Response:

We really appreciate the reviewer's thoughtful comments. It helps to improve our manuscript by addressing these issues. We have made several changes accordingly.

1. Rerun the assimilation experiment with looser filter criteria, in which the interannual changes were better captured.
2. Added quantitative results in tables, including the statistics of control and assimilation experiments, and also the statistics of interannual differences of meteorology conditions.

Please see our itemized responses below. Revised manuscript is after the response letter.

Specific Comments:

(1) Page 7, Line 11:

“The spatial distributions of primary PM<sub>2.5</sub> emission are shown in Fig. 1”. Here Fig 1 should be Fig 2. Does primary PM<sub>2.5</sub> correspond to BC, OC, and OIN in the WRF-Chem model? Since PM<sub>2.5</sub> is also produced secondary in the air, it should be useful to show its precursor emissions, such as NO<sub>x</sub> or SO<sub>2</sub>.

**Response:**

Thanks for pointing out the typo! The figure number in the text has been corrected.

Yes, the primary PM<sub>2.5</sub> corresponds to the total of BC, OC, sulfate, nitrate and other PM emissions. The emission spatial distribution of SO<sub>2</sub>, NO<sub>x</sub> and NH<sub>3</sub> have been added in Figure 2.

(2) Page 10, Line 5-8 about the data quality filter:

The study states that PM<sub>2.5</sub> observational values larger than 500  $\mu\text{g m}^{-3}$  were deemed unrealistic and observations leading to deviations exceeding 120  $\mu\text{g m}^{-3}$  were also omitted. It is not clear to me how these thresholds would impact the results and the conclusions of this study. What are the fractions of data that were omitted by the filters? In winter, some cases can meet the thresholds and can be realistic. So what would happen if a looser filter was applied. Please add some discussions.

**Response:**

Thanks for the suggestion! The criteria for filter process are from two aspects, including the stability of DA optimization step and the computing efficiency. The original criteria were mostly set for operational runs. For research purpose, we have made tests of different filter process and found that looser filter can really improve the assimilation results. Here in the revised manuscript, only PM<sub>2.5</sub> observations larger than 1000  $\mu\text{g m}^{-3}$  (the maximum display limit of the monitoring system) were deemed unrealistic in the filter process and observations leading to deviations exceeding 500  $\mu\text{g m}^{-3}$  were omitted. Besides, in the original assimilation experiment observational sites located in grids with elevation greater than 500 meter (Above Sea-Level) were not used; to better utilize those data, we chose to interpolate them to the lowest model level for assimilation. The data used in the two assimilation experiments increased from 3580876 (62.4%) to 5309200 (92.6%) by setting looser filters. It should be corrected that the number of data (top panel) in Figure 4 are actually the data available for comparisons, not the data used in the assimilation cycle.

Below show the observed, original and updated assimilations of monthly average of PM<sub>2.5</sub> concentrations (unit:  $\mu\text{g m}^{-3}$ ) for January in 2015 (Left), 2016 (middle) and 2017 (right). The most prominent improvements are shown for the hotspots in Xinjiang (region d) and Fenwei Plain (added as region e).

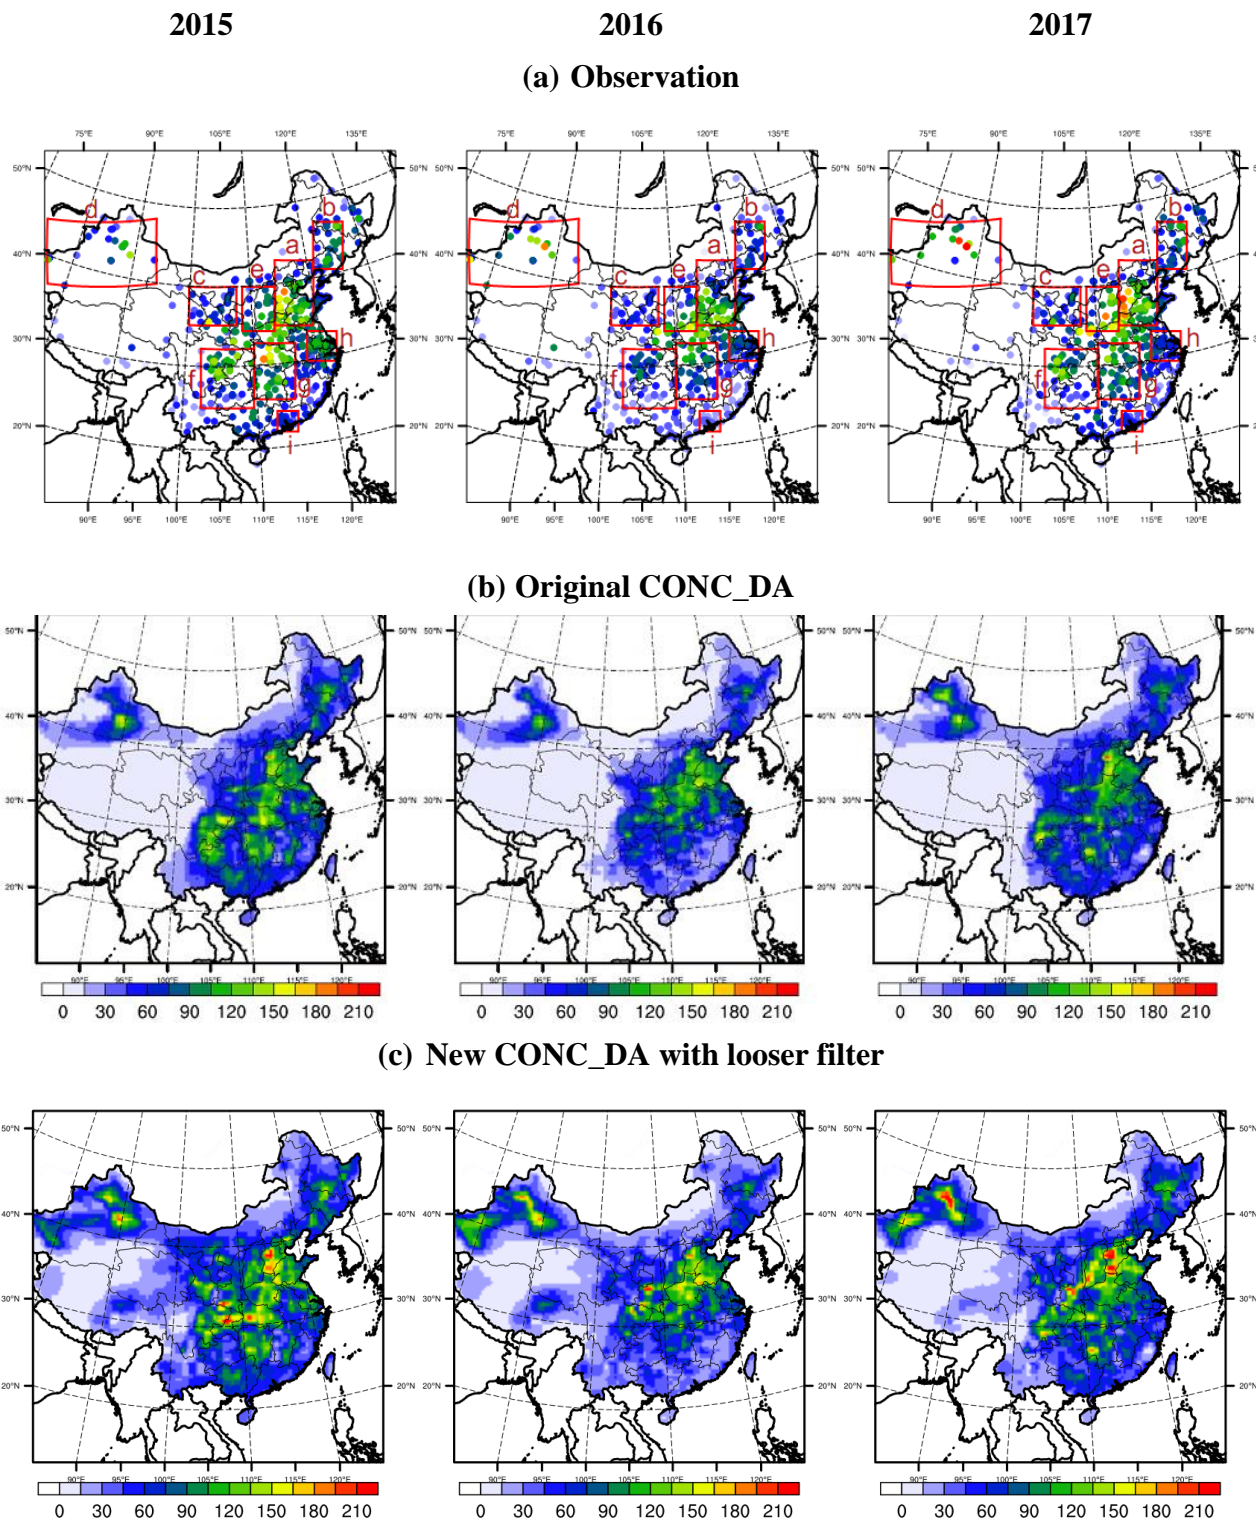

**Figure S1.** Observed and modeled monthly average of  $PM_{2.5}$  concentrations (Unit:  $\mu g m^{-3}$ ) for January in 2015 (Left), 2016 (middle) and 2017 (right). (a) Observation, (b) Original CONC\_DA, (c) New CONC\_DA with looser filter. Regions defined in red rectangles are: a-NCP (North China Plain), b-NEC (Northeastern China), c- EGT (Energy Golden Triangle), d-XJ (Xinjiang), e-Fenwei Plain (FWP), f-SB (Sichuan Basin), g-CC (Central China), h-YRD (Yangtze River Delta), i-PRD (Pearl River Delta).

In the updated assimilation experiment, the interannual changes were also captured as shown below. Those improvements make our analysis more solid, especially for the Xinjiang region and Fenwei Plain. The updated figures and discussions are highlighted in blue in the revised manuscript.

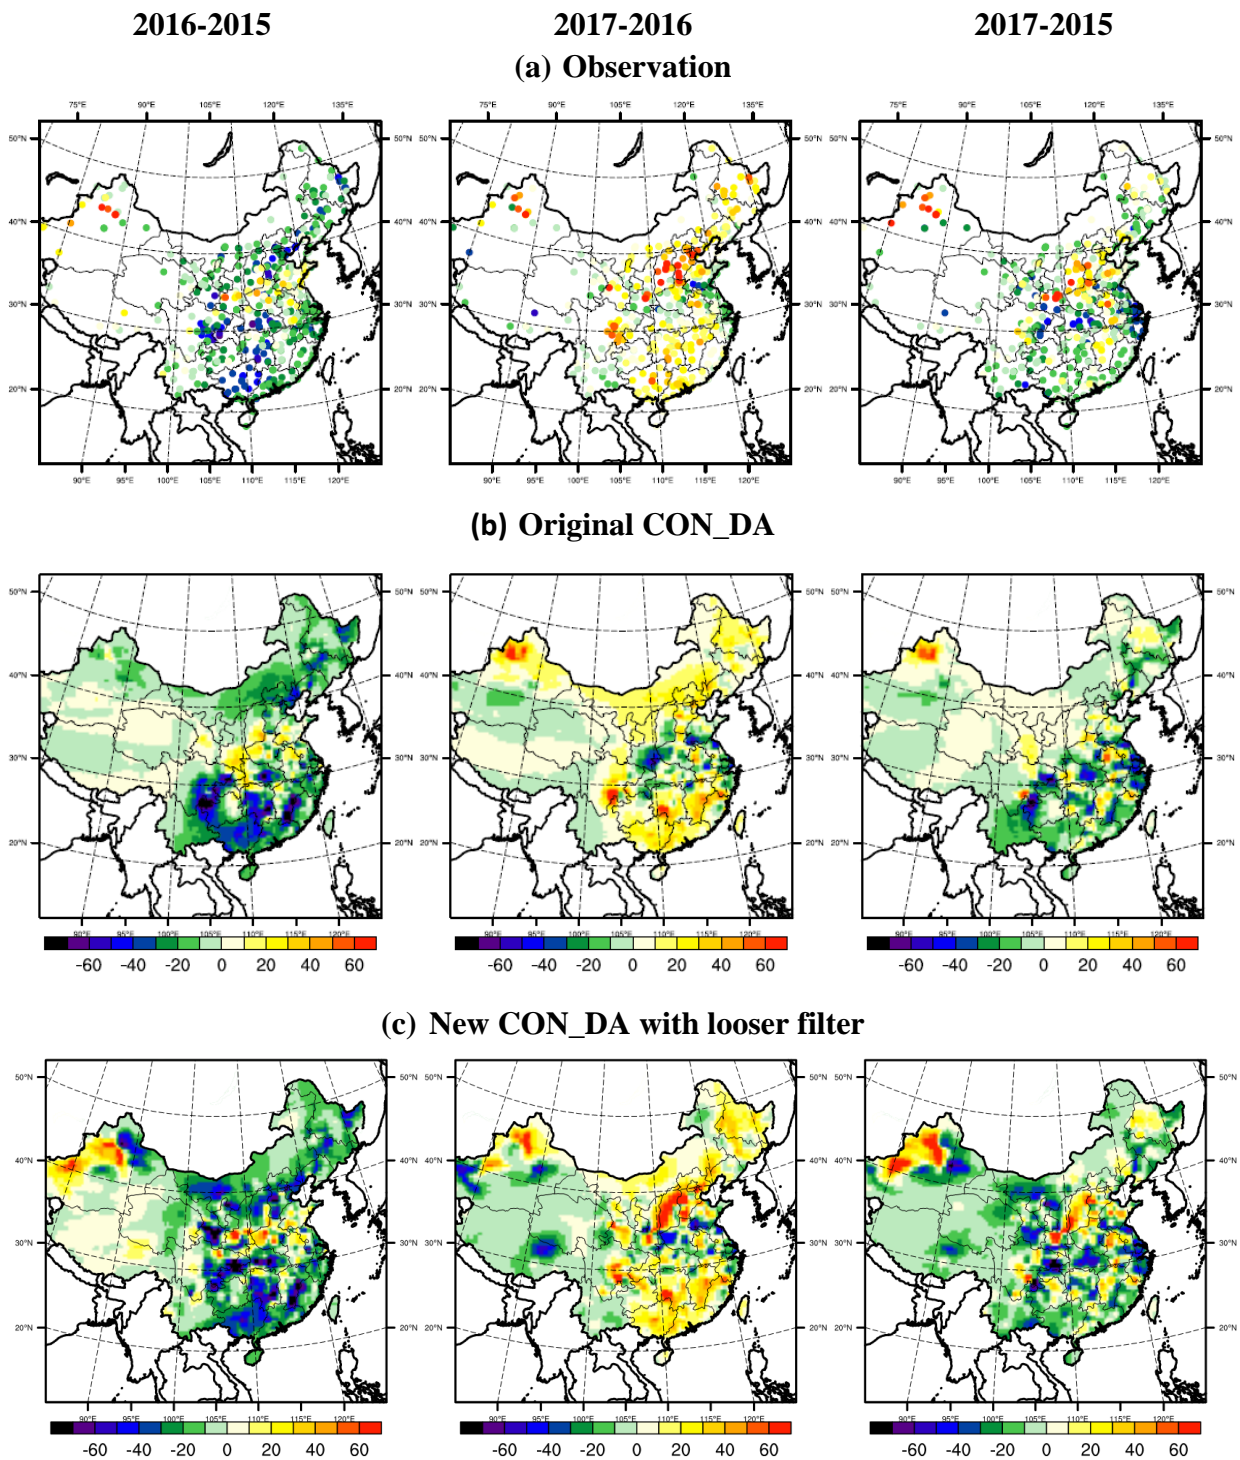

**Figure S2.** Observed and modeled  $PM_{2.5}$  ambient concentration changes for 2016-2015 (left), 2017-2016 (middle) and 2017-2015 (right). (a) Observation, (b) Original CON\_DA, (c) New CON\_DA with looser filter. (Unit:  $\mu g m^{-3}$ )

(3) Page 14, Section 3.1:

It shall be valuable to add a table in this section, similar to current Table 4, but summarizing the mean observed vs. simulated  $PM_{2.5}$  concentrations over the 8 regions defined in Figure 3. The readers can then have a more quantitative picture on how effective the data assimilation system is.

**Response:**

Thanks for the suggestion. Yes, we have added the statistics in Table 3.

**Table 3.** Statistics of the observed and model-simulated surface PM<sub>2.5</sub> for January 2015, 2016 and 2017 in 9 regions (units are  $\mu\text{g m}^{-3}$  for BIAS and RMSE).

| Statistics | Sites | Pairs of data | BIAS   |         | RMSE   |         | CORR  |         |
|------------|-------|---------------|--------|---------|--------|---------|-------|---------|
|            |       |               | NO_DA  | CONC_DA | NO_DA  | CONC_DA | NO_DA | CONC_DA |
| 2015       |       |               |        |         |        |         |       |         |
| NCP        | 67    | 46699         | 19.38  | 2.08    | 68.09  | 24.26   | 0.72  | 0.96    |
| NEC        | 30    | 20910         | -11.94 | -1.04   | 49.47  | 21.11   | 0.59  | 0.93    |
| EGT        | 28    | 19516         | -40.43 | 5.28    | 60.62  | 19.45   | 0.37  | 0.90    |
| XJ         | 19    | 13243         | -53.76 | 4.16    | 71.69  | 19.74   | 0.40  | 0.94    |
| FWP        | 27    | 18819         | 4.05   | 1.75    | 56.71  | 23.05   | 0.63  | 0.93    |
| SB         | 48    | 33456         | 98.02  | 0.61    | 125.76 | 20.76   | 0.55  | 0.94    |
| CC         | 49    | 34153         | 46.94  | -0.38   | 81.31  | 21.18   | 0.46  | 0.93    |
| YRD        | 34    | 23698         | 32.22  | -0.43   | 59.90  | 15.14   | 0.73  | 0.96    |
| PRD        | 20    | 13940         | 19.36  | -0.03   | 47.81  | 9.10    | 0.24  | 0.95    |
| 2016       |       |               |        |         |        |         |       |         |
| NCP        | 67    | 46699         | 20.90  | 1.41    | 57.77  | 20.74   | 0.78  | 0.96    |
| NEC        | 30    | 20910         | -11.05 | 0.04    | 40.91  | 16.08   | 0.57  | 0.94    |
| EGT        | 28    | 19516         | -22.55 | 0.69    | 39.63  | 13.75   | 0.42  | 0.90    |
| XJ         | 19    | 13243         | -72.92 | 0.25    | 98.19  | 27.16   | 0.51  | 0.96    |
| FWP        | 27    | 18819         | -3.51  | 1.51    | 62.04  | 26.01   | 0.76  | 0.94    |
| SB         | 48    | 33456         | 134.63 | 2.77    | 165.38 | 15.49   | 0.51  | 0.92    |
| CC         | 49    | 34153         | 86.28  | 1.89    | 109.09 | 18.76   | 0.46  | 0.92    |
| YRD        | 34    | 23698         | 46.13  | 1.03    | 62.11  | 13.40   | 0.73  | 0.95    |
| PRD        | 20    | 13940         | 59.79  | 2.05    | 74.76  | 6.51    | 0.04  | 0.91    |
| 2017       |       |               |        |         |        |         |       |         |
| NCP        | 67    | 46699         | 25.75  | 2.35    | 82.31  | 28.91   | 0.74  | 0.95    |
| NEC        | 30    | 20910         | -11.38 | 0.01    | 53.38  | 21.35   | 0.64  | 0.94    |
| EGT        | 28    | 19516         | -26.88 | 1.40    | 48.83  | 16.96   | 0.41  | 0.90    |
| XJ         | 19    | 13243         | -95.92 | 3.82    | 125.09 | 35.65   | 0.51  | 0.96    |
| FWP        | 27    | 18819         | -6.78  | -1.02   | 89.26  | 31.69   | 0.65  | 0.94    |
| SB         | 48    | 33456         | 122.82 | 2.33    | 149.08 | 20.08   | 0.56  | 0.93    |
| CC         | 49    | 34153         | 101.22 | 3.49    | 132.97 | 19.50   | 0.23  | 0.92    |
| YRD        | 34    | 23698         | 59.31  | 2.40    | 78.02  | 12.32   | 0.63  | 0.93    |
| PRD        | 20    | 13940         | 35.01  | 0.04    | 61.84  | 9.55    | -0.16 | 0.94    |

(4) Page 15, Section 3.2:

The use of MODIS AOD data was only for support of the AOD decreases over the Sichuan Basin and Central China after data assimilation. This seems to be insufficient.

How about the inter-annual variability of MODIS AOD over January 2015-2017? Are they consistent with surface PM<sub>2.5</sub> measurements? Please clarify.

**Response:**

Actually it's difficult to make judge of the assimilation experiment improvements by using MODIS/AERONET AOD data, as the vertical profiles and the assumptions of optical properties in the model can't be evaluated at this stage. According to the other reviewer's suggestion, we decided to remove the entire session relevant with MODIS/AERONET AOD.

(5) Page 18, Line 23:

In the statement “meteorological conditions might be totally different from 2016 to 2017”, “totally” is a very strong word, however, it is not clear how different 2017 meteorological conditions are different from normal wintertime conditions with Siberian Highs. I have the same comment for Page 20, Line 13, Line 19, the word “totally” is not helpful. I suggest use more quantitative statements, for example, higher temperature by how much?

**Response:**

Thanks for the suggestion! Yes, those statements are too strong and not quantitative. We have added the statistic of the meteorology differences by regions in Table 5 and also changed the statements in the texts accordingly.

**Table 5.** Statistics of the meteorological differences by region for January 2015, 2016 and 2017.

|     | PBLH (meter) |       |       | PSFC (Pa) |       |       | T2 (degree) |      |      | RH2 (%) |       |      | WS10 (m/s) |       |       |
|-----|--------------|-------|-------|-----------|-------|-------|-------------|------|------|---------|-------|------|------------|-------|-------|
|     | 2016         | 2017  | 2017  | 2016      | 2017  | 2017  | 2016        | 2017 | 2017 | 2016    | 2017  | 2017 | 2016       | 2017  | 2017  |
|     | -            | -     | -     | -         | -     | -     | -           | -    | -    | -       | -     | -    | -          | -     | -     |
|     | 2015         | 2016  | 2015  | 2015      | 2016  | 2015  | 2015        | 2016 | 2015 | 2015    | 2016  | 2015 | 2015       | 2016  | 2015  |
| NCP | 27.9         | -26.7 | 1.2   | 138.5     | -30.2 | 108.4 | -4.9        | 3.3  | -1.6 | 3.0     | 5.1   | 8.1  | 1.15       | -0.78 | 0.37  |
| NEC | 22.7         | 35.3  | 58.0  | 117.0     | -58.7 | 58.3  | -4.9        | 4.4  | -0.5 | -5.7    | 3.1   | -2.6 | 0.96       | -0.38 | 0.57  |
| EGT | 13.6         | 1.1   | 14.7  | 28.0      | -8.4  | 19.7  | -4.0        | 4.0  | 0.0  | 10.0    | -14.9 | -4.9 | 0.14       | -0.50 | -0.36 |
| XJ  | -0.9         | -13.8 | -14.7 | 151.3     | -43.1 | 108.1 | -1.3        | -0.8 | -2.1 | 5.5     | -2.1  | 3.4  | 0.36       | -0.14 | 0.22  |
| FWP | 67.7         | -51.6 | 16.1  | 64.6      | -12.2 | 52.4  | -3.8        | 3.4  | -0.4 | 2.8     | -0.8  | 2.0  | 1.05       | -1.00 | 0.06  |
| SB  | 9.8          | -13.2 | -3.4  | -15.9     | 15.9  | 0.1   | -2.4        | 2.5  | 0.2  | 3.9     | -1.8  | 2.0  | 0.43       | -0.02 | 0.41  |
| CC  | 34.8         | -56.6 | -21.9 | 82.8      | -53.2 | 29.6  | -2.5        | 2.1  | -0.3 | 10.8    | 0.7   | 11.5 | 0.60       | -0.07 | 0.53  |
| YRD | 64.7         | -22.0 | 42.7  | 77.1      | -27.8 | 49.2  | -1.7        | 1.9  | 0.2  | 7.8     | 2.5   | 10.3 | 0.89       | -0.40 | 0.49  |
| PRD | -36.1        | 8.2   | -27.9 | -16.2     | -60.1 | -76.3 | -0.5        | 2.4  | 1.9  | 11.9    | -8.7  | 3.2  | 0.94       | -0.48 | 0.46  |

(6) Page 20, Line 15:

What does “higher RH (thus more reactions)” mean? How higher RH lead to more chemical reactions? Please clarify.

**Response:**

Yes, in our updated chemistry scheme with newly added heterogeneous reactions (SO<sub>2</sub>, NO<sub>2</sub> and NO<sub>3</sub> relevant), higher RH may cause higher uptake coefficients thus more reactions. In the new scheme, the lower and upper limits were used to present a range of uptake coefficient values in the laboratory measurements which were applied when RH is lower than 50% and higher than 90%, respectively. The values in the 50-90% RH range are linearly interpolated based on the two limits. It means when RH exceeds 50%, the uptake coefficients would increase quickly. The details are in Chen (et al. 2016).

In relatively humid regions, such as Central China, Yangtze River Delta and Pearl River Delta, the inter-annual changes of RH<sub>2</sub> reached ~10%, which are expecting to affect the heterogeneous reactions.

(7) Captions of Figure 7 and Figure 9: Please indicate here that the comparisons are for the January month.

**Response:**

Clarified in the caption.

(8) Some technical corrections:

Page 2, Line 8 - “modeled PM2.5 are” should be “modeled PM2.5 concentrations are”

Page 13, Line 7 - “reflect combining effects” should be “reflect combined effects”

Page 14, Line 11 - “the 2010 EI” should be “the 2010 emissions”

Page 19, Line 17 - “the emission in : : :” should be “the emissions in : : :”

**Response:**

Corrected accordingly.

1 **Retrospective analysis of 2015-2017 winter-time PM<sub>2.5</sub> in China: response to emission**  
2 **regulations and the role of meteorology**

3  
4  
5 Dan Chen<sup>1\*</sup>, Zhiquan Liu<sup>2\*</sup>, Junmei Ban<sup>2</sup>, Pusheng Zhao<sup>1</sup>, and Min Chen<sup>1</sup>

6 <sup>1</sup>Institute of Urban Meteorology, China Meteorological Administration, Beijing, 100089, China

7 <sup>2</sup>National Center for Atmospheric Research, Boulder, CO, 80301, USA  
8  
9

10 **February, 2019**  
11

---

\* Corresponding author: Dr. Zhiquan Liu ([liuz@ucar.edu](mailto:liuz@ucar.edu)) and Dr. Dan Chen ([dchen@ium.cn](mailto:dchen@ium.cn))



## 1 **Abstract**

2 To better characterize anthropogenic emission-relevant aerosol species, the GSI-WRF/Chem data  
3 assimilation system was updated from the GOCART aerosol scheme to the MOSAIC-4BIN scheme. Three  
4 years (2015-2017) of wintertime (January) surface PM<sub>2.5</sub> observations from 1600+ sites were assimilated  
5 hourly using the updated 3DVAR system. In the control experiment (without assimilation) using 2010\_MEIC  
6 emissions, the modeled January averaged PM<sub>2.5</sub> concentrations were severely overestimated in the Sichuan  
7 Basin, Central China, Yangtze River Delta, and Pearl River Delta by 98-134, 46-101, 32-59, and 19-60 μg m<sup>-3</sup>,  
8 respectively, indicating that the emissions for 2010 are not appropriate for 2015-2017, as strict emission  
9 control strategies were implemented in recent years. Meanwhile, underestimations of 11-12, 53-96, and 22-40  
10 μg m<sup>-3</sup> were observed in northeastern China, Xinjiang and the Energy Golden Triangle, respectively. The  
11 assimilation experiment significantly reduced both high and low biases to within ±5 μg m<sup>-3</sup>.

12 The observations and the reanalysis data from the assimilation experiment were used to investigate the  
13 year-to-year changes and the driving factors. The role of emissions was obtained by subtracting the  
14 meteorological impacts (by control experiments) from the total combined differences (by assimilation  
15 experiments). The results show a reduction in PM<sub>2.5</sub> of approximately 15 μg m<sup>-3</sup> for the month of January from  
16 2015 to 2016 in the North China Plain (NCP), but meteorology played the dominant role (contributing a  
17 reduction of approximately 12 μg m<sup>-3</sup>). The change (for January) from 2016 to 2017 in NCP was different;  
18 meteorology caused an increase in PM<sub>2.5</sub> of approximately 23 μg m<sup>-3</sup>, while emission control measures caused  
19 a decrease of 8 μg m<sup>-3</sup>, and the combined effects still showed a PM<sub>2.5</sub> increase for that region. The analysis  
20 confirmed that emission control strategies were indeed implemented and emissions were reduced in both years.  
21 Using a data assimilation approach, this study helps identify the reasons why emission control strategies may  
22 or may not have an immediately visible impact. There are still large uncertainties in this approach, especially  
23 the inaccurate emission inputs, and neglecting aerosol-meteorology feedbacks in the model can generate large  
24 uncertainties in the analysis as well.

## 25 **1. Introduction**

26 Anthropogenic PM<sub>2.5</sub> (fine particulate matter with an aerodynamic diameter smaller than 2.5 μm) is  
27 known as a robust indicator of mortality and other negative health effects associated with ambient air pollution.

1 PM<sub>2.5</sub> components are originate not only from primary emissions but also from secondary formations through  
2 various precursors (e.g., SO<sub>2</sub>, NO<sub>x</sub>, and VOCs). Regional haze with extremely high PM<sub>2.5</sub> concentrations  
3 (exceeding the WHO standard tenfold) has become the primary air quality concern in China, especially over  
4 northern China (e.g., Wang *et al.* 2014a, 2014b; Han *et al.* 2015; Sun *et al.* 2015). To control PM<sub>2.5</sub> pollution  
5 and improve the overall air quality, a series of strict pollution control strategies have been implemented by the  
6 government since 2010, including the *Guiding Options on Promoting the Joint Prevention and Control of Air*  
7 *Pollution to Improve Regional Air Quality* (The Central Government of the People's Republic of China, 2010)  
8 and the *Atmospheric Pollution Prevention and Control Action Plan* (The Central Government of the People's  
9 Republic of China, 2013), in which the government stated that environmental-related equipment (for flue-gas  
10 desulfurization, selective catalyst reduction, exhaust dust removal, etc.) are mandatory for both industries and  
11 vehicles. In addition to long-term pollution control strategies, different emergency measures under different  
12 pollution alerts were also implemented occasionally. For example, the production of large industrial sources  
13 (coal burning and cement) was limited to reduce emissions, construction sites were restricted to prevent  
14 fugitive dust pollution, and traffic restrictions were implemented on even- and odd-numbered license plates.  
15 These emission control strategies were stricter and implemented more often in northern China than anywhere  
16 else in winter, when haze events occur more frequently. These control strategies were expected to reduce both  
17 the concentrations of significant precursors (e.g., SO<sub>2</sub>, NO<sub>x</sub>) and the emissions of PM<sub>2.5</sub>.

18 Despite these strict emission control strategies, the ambient PM<sub>2.5</sub> concentrations in major cities still  
19 fluctuated during the wintertime from year to year. For example, the overall January PM<sub>2.5</sub> concentrations in  
20 74 cities generally decreased from 2015 to 2016, but the concentrations in January 2017 were still higher than  
21 those in 2016 (*Ambient Air Quality Monthly Report 2015-01/2016-01/2017-01*,  
22 <http://www.cnemc.cn/kqzlkbgbyb2092938.jhtml>). While annual emission reduction trends were expected  
23 from 2015 to 2017, the overall increase in the surface concentrations observed in January 2017 contradicted  
24 these expectations, thereby indicating that other factors (especially meteorological conditions) in addition to  
25 emissions may play important roles. Some studies have attempted to investigate the variability of air pollution

1 and the effects of climate change on wintertime air pollution by using statistical data. Li *et al.* (2016) indicated  
2 that wintertime fog-haze days across central and eastern China have a close relationship with the East Asian  
3 winter monsoon. Zuo *et al.* (2015) concluded that the significant weakening and strengthening of the Siberian  
4 high and East Asian trough, respectively, are the two main factors for the occurrence of extreme cold and  
5 extreme warm events over China in winter, when warm air boosts air pollution. In addition to utilizing  
6 statistical methodology, it is necessary to distinguish the roles of emissions and meteorology to further  
7 investigate the driving factors of interannual air pollution changes.

8 Regional air quality models are important tools for scientifically understanding the formation of haze  
9 events, technically constructing forecasts, and evaluating the effects of control strategies. For regional  
10 modeling studies, emission inventories are important for reflecting the emission inputs into the atmosphere.  
11 Generally, an emission inventory is based on a “bottom-up” methodology, thereby relying on the statistics of  
12 energy activity and emission factors, etc. However, uncertainties in energy statistics can cause variations in  
13 the emission estimates (Zhao *et al.*, 2017; Hong *et al.*, 2017; Zhi *et al.*, 2017). For regional modeling  
14 applications, the total emissions based on statistics are spatially and temporally distributed according to  
15 relevant factors (He, 2012). Nevertheless, the occasional emission control strategies implemented in winter  
16 can cause large uncertainties in not only total emission estimations but also spatial and temporal allocations,  
17 which would lead to large biases in the model simulations.

18 In addition to the uncertainties in emission inventories, deficiencies in the model chemistry can also cause  
19 model uncertainties. Increasing numbers of observations have revealed that anthropogenic emission-relevant  
20 aerosol species, such as sulfate, nitrate and ammonium (denoted as SNA), are the predominant inorganic  
21 species in the wintertime PM<sub>2.5</sub> in China (Wang *et al.*, 2014c; Yang *et al.*, 2015). Various reaction paths during  
22 haze events have also been proposed (e.g. Zheng *et al.*, 2015; Cheng *et al.*, 2016; Wang *et al.*, 2016; Li *et al.*,  
23 2017; Moch *et al.*, 2018; Wang *et al.*, 2018; Shao *et al.*, 2019). For example, Moch *et al.* (2018) used a 1-D  
24 model and revealed the importance of aqueous-phase chemistry of HCHO and S(IV) in cloud droplets by  
25 forming a S(IV)-HCHO adduct, hydroxymethane sulfonate. Shao *et al.* (2019) implemented four

1 heterogeneous sulfate formation mechanisms (via  $\text{H}_2\text{O}_2$ ,  $\text{O}_3$ ,  $\text{NO}_2$ , and transition metal ions on aerosols) into  
2 GEOS-Chem model which partially reduced the modeled low bias in sulfate concentrations. However, a  
3 scientific consensus regarding the importance of the reaction paths has not yet been reached partially due to  
4 the uncertainties of aerosol liquid water content, pH, and ionic strength etc. The original WRF/Chem model  
5 with either the Goddard Chemistry Aerosol Radiation and Transport (GOCART, Chin *et al.*, 2000, 2002) or  
6 the Model for Simulating Aerosol Interactions and Chemistry (MOSAIC)-4BIN aerosol scheme failed to  
7 reproduce the highest  $\text{PM}_{2.5}$  concentrations; it is assumed that this failure is due to missing  
8 heterogeneous/aqueous reactions. In Chen *et al.* (2016, hereafter Chen16), we added three heterogeneous  
9 reactions ( $\text{SO}_2$ -to- $\text{H}_2\text{SO}_4$  and  $\text{NO}_2/\text{NO}_3$ -to- $\text{HNO}_3$ ) to the WRF/Chem model based on the MOSAIC-4BIN  
10 aerosol scheme. Although the reaction paths may still not be comprehensively understood, the new MOSAIC-  
11 4BIN aerosol scheme significantly improved the simulation of sulfate, nitrate, and ammonium on polluted  
12 days in terms of the concentrations of those species and their partitioning.

13 Data assimilation (DA), that is, the combination of observations with numerical model output, has proven  
14 to be skillful at improving aerosol forecasts (e.g., Collins *et al.*, 2001; Pagowski *et al.*, 2010; Liu *et al.*, 2011;  
15 Liu *et al.*, 2016; Zhang *et al.*, 2016). Liu *et al.* (2011, hereafter Liu11) implemented DA on AOD estimates  
16 within the National Centers for Environmental Prediction (NCEP) gridpoint statistical interpolation (GSI)  
17 three-dimensional variational (3DVAR) DA system coupled with the GOCART aerosol scheme within the  
18 Weather Research and Forecasting/Chemistry (WRF/Chem) model (Grell *et al.*, 2005). Schwartz *et al.* (2012,  
19 hereafter S12) and Jiang *et al.* (2013, hereafter Jiang13) extended the above system to assimilate surface  $\text{PM}_{2.5}$   
20 and  $\text{PM}_{10}$ . The evaluation results demonstrated improved aerosol forecasts from the DA system in studies over  
21 East Asia and the United States.

22 Following Liu11, S12 and Chen16, we updated the GSI-WRF/Chem system by changing from the  
23 GOCART aerosol scheme to the MOSAIC-4BIN aerosol scheme to better characterize the complex  $\text{PM}_{2.5}$   
24 pollution in China. We applied the updated system to assimilate  $\text{PM}_{2.5}$  concentrations of January 2015, 2016  
25 and 2017 for two purposes: 1) to reproduce the  $\text{PM}_{2.5}$  output by the DA system and 2) to investigate the

1 different impacts of meteorological conditions and emissions on the PM<sub>2.5</sub> pollution in different years. In this  
2 paper, section 2 provides descriptions of the model, observations and methodology and addresses the updated  
3 GSI-WRF/Chem-coupled DA system with the MOSAIC-4BIN aerosol scheme. In section 3, the assimilation  
4 results for the PM<sub>2.5</sub> concentrations from January 2015, 2016 and 2017 are presented and compared with  
5 surface observations (PM<sub>2.5</sub> total mass) to evaluate the DA system. In contrast to previous applications  
6 emphasizing the forecast skill improvement achieved by the DA system, we fully utilized reanalysis data to  
7 investigate the driving factors of pollution and to differentiate the roles played by meteorological conditions  
8 and emissions in different years by analyzing the reanalysis data and model simulations. The results are given  
9 in section 4, and the conclusions are given in section 5.

## 10 **2. Model description, observations and methodology**

11 The WRF/Chem settings are very similar to those of Chen16, although Chen16 focused on the SNA  
12 aerosols in the North China Plain during October 2014; in addition, several heterogeneous reactions were  
13 newly added to the original chemistry modules to improve the SNA simulation performance. The DA system  
14 used herein was based upon the NCEP GSI system extended by Liu11 and S12. We assimilated surface PM<sub>2.5</sub>  
15 observations, and the only difference is that the MOSAIC-4Bin aerosol scheme (32 PM species) was chosen  
16 for the WRF/Chem model instead of the GOCART aerosol scheme. Thus, the 3-D mass mixing ratios of those  
17 MOSAIC species at each grid point composed the analysis (or control) variables in the GSI 3DVAR  
18 minimization process.

19 Here, only a brief summary of the WRF/Chem configuration is provided below prior to a description of  
20 the updated GSI DA system and the settings used in this work. The most important differences are noted, e.g.,  
21 the forward operator for observations in the GSI system.

### 22 **2.1 WRF/Chem model and emissions**

23 As in Chen16, version 3.6.1 of the WRF/Chem model was used in this study (Grell *et al.*, 2005; Fast *et*  
24 *al.*, 2006). The physical parameterizations employed in the WRF/Chem model were identical to those of

Chen16, and they are listed in Table 1. The Carbon-Bond Mechanism version Z (CBMZ) and the Model for Simulating Aerosol Interactions and Chemistry (MOSAIC) were used as the gas phase and aerosol chemical mechanisms, respectively, in this study. The aerosol species in MOSAIC are defined as black carbon (BC), organic compounds (OC), sulfate (SO<sub>4</sub>), nitrate (NO<sub>3</sub>), ammonium (NH<sub>4</sub>), sodium (NA), chloride (CL) and other inorganic compounds (OIN). We used 4 size bins with aerosol diameters ranging from 0.039-0.1, 0.1-1.0, 1.0-2.5, and 2.5-10 μm. The 24 variables in the first three bins (8 species times 3 bins) consist of the PM<sub>2.5</sub> total. The newly added relative humidity (RH)-dependent SO<sub>2</sub>-to-H<sub>2</sub>SO<sub>4</sub> and NO<sub>2</sub>/NO<sub>3</sub>-to-HNO<sub>3</sub> heterogeneous reactions (details are provided in Chen16) were also applied in the simulations.

The model domain with a 40-km horizontal grid spacing covers most of China and the surrounding regions (Fig. 2), and there are 57 vertical levels extending from the surface to 10 hPa. The simulation started from Dec. 20 of the previous year; the first eleven days were treated as a spin-up period and were not used in our analyses.

**Table 1.** WRF/Chem model configuration.

|                                             |                                                                                |
|---------------------------------------------|--------------------------------------------------------------------------------|
| Aerosol scheme                              | MOSAIC (4 bins) (Zaveri <i>et al.</i> , 2008)                                  |
| Photolysis scheme                           | Fast-J (Wild <i>et al.</i> , 2000)                                             |
| Gas phase chemistry                         | CBM-Z (Zavier <i>et al.</i> , 1999)                                            |
| Cumulus parameterization                    | Grell 3D scheme                                                                |
| Short-wave radiation                        | Goddard Space Flight Center Shortwave radiation scheme (Chou and Suarez, 1994) |
| Long-wave radiation                         | RRTM (Mlawer <i>et al.</i> , 1997)                                             |
| Microphysics                                | Single-Moment 6-class scheme (Grell and Devenyi, 2002)                         |
| Land-surface model                          | NOAH LSM (Chen and Dudhia, 2001)                                               |
| Boundary layer scheme                       | YSU (Hong <i>et al.</i> , 2006)                                                |
| Meteorology initial and boundary conditions | GFS analysis and forecast every 6 hour                                         |
| Initial condition for chemical species      | 11-day spin-up                                                                 |
| Boundary conditions for chemical species    | averages of mid-latitude aircraft profiles (McKeen <i>et al.</i> , 2002)       |
| Dust and sea salt Emissions                 | GOCART                                                                         |

As in Chen16, the Multi-resolution Emission Inventory for China (MEIC) (Zhang *et al.*, 2009; Lei *et al.*, 2011; He 2012; Li *et al.*, 2014) for January 2010 was used as the emission input, [as it is the only emission](#)

1 inventory that was publicly available when the study was conducted. The original grid spacing of the MEIC  
2 is  $0.25^\circ \times 0.25^\circ$ , and this inventory has been processed to match the model grid spacing (40 km). The spatial  
3 distributions of primary  $\text{PM}_{2.5}$ ,  $\text{SO}_2$ ,  $\text{NO}_x$  and  $\text{NH}_3$  emissions are shown in Fig. 2. The MEIC-2010 emission  
4 inventory has already been applied in other studies (e.g., Wang *et al.*, 2014a; Zheng *et al.*, 2015) for  
5 simulations over China in the past few years; these recent studies found that the MEIC provides reasonable  
6 estimates of total emissions but is subject to uncertainties in the spatial allocations of these emissions over  
7 small spatial scales. For our simulations, uncertainties may also arise from two other sources: the difference  
8 between the emission base year (2010) and our simulation period (2015 through 2017) and the monthly  
9 allocations. As the Chinese government has implemented strict control strategies to ensure an improved air  
10 quality during the winter season since 2013, significant reductions in emissions, including primary PM and  
11 precursor compounds ( $\text{SO}_2$  and  $\text{NO}_x$ ), in regions with the strict implementation of these policies relative to the  
12 year 2010 are expected for our simulation period. A reduction in  $\text{SO}_2$  pollution of approximately 50% was  
13 observed from 2012-2015 for the North China Plain from OMI satellite data (Krotkov *et al.*, 2016). National  
14 anthropogenic emission reductions of approximately 67%, 17%, and 35% from 2012-2017 for  $\text{SO}_2$ ,  $\text{NO}_x$ , and  
15  $\text{PM}_{2.5}$ , respectively, were assumed by the bottom-up EI methodology (Zheng *et al.*, 2018). However, the  
16 expansion and relocation of the energy industry caused emission increases in northwestern China (Ling *et al.*,  
17 2017). In addition, the uncertainties of allocated emissions in the winter season will be much larger than those  
18 in other seasons. For example, Zhi *et al.* (2017) conducted a village energy survey and revealed an enormous  
19 discrepancy in the amount of rural raw coal used for winter heating in northern China, implying an extreme  
20 underestimation of rural household coal consumption by the China Energy Statistical Yearbooks. These  
21 changes and uncertainties of emissions in the model would introduce errors into the NO\_DA simulation.  
22 However, the inhomogeneous spatial changes and large uncertainties of seasonal allocations made it difficult  
23 to simply scale the original emission inventory for our study period.

## 24 2.2 Updated GSI 3DVAR DA system

25 The NCEP's GSI 3DVAR DA system was used to assimilate surface  $\text{PM}_{2.5}$  observations. The GSI 3DVAR

DA system calculates a best-fit analysis considering the observations (hourly surface PM<sub>2.5</sub> concentrations in our case) and background fields (a 1-hr short-term WRF/Chem forecast in our case) weighted by their error characteristics. The GSI 3DVAR DA system produces an analysis in a model grid space through the minimization of a scalar objective function  $J(\mathbf{x})$  given by

$$J(\mathbf{x}) = \frac{1}{2}(\mathbf{x} - \mathbf{x}_b)^T \mathbf{B}^{-1}(\mathbf{x} - \mathbf{x}_b) + \frac{1}{2}[\mathbf{H}(\mathbf{x}) - \mathbf{y}]^T \mathbf{R}^{-1}[\mathbf{H}(\mathbf{x}) - \mathbf{y}], \quad (1)$$

where  $\mathbf{x}_b$  denotes the background vector (with dimension  $m$ ),  $\mathbf{y}$  is a vector of observations (with dimension  $p$ ), and  $\mathbf{B}$  and  $\mathbf{R}$  represent the background and observation error covariance matrices of dimensions  $m \times m$  and  $p \times p$ , respectively. The covariance matrices determine the relative contributions of the background and observation terms to the final analysis.  $H$  is the potentially nonlinear “observation operator” that interpolates the model grid point values into observation spaces and converts model-predicted variables into observed quantities.

### 2.2.1 PM<sub>2.5</sub> observation operator

In our updated DA system, GSI was used to assimilate surface PM<sub>2.5</sub> total mass observations, whereas the WRF/Chem model predicts the PM<sub>2.5</sub> total mass as different prognostic variables depending on the chosen aerosol scheme. As we chose the MOSAIC-4Bin aerosol scheme, the analysis variables here were the 3D mass mixing ratios of the 24 MOSAIC aerosol variables at each grid point. The model-simulated PM<sub>2.5</sub> observations  $M_{PM_{2.5}}$  were computed by summing the 24 species as

$$M_{PM_{2.5}} = \sum_{i=1}^3 [BC_i + OC_i + SO4_i + NO3_i + NH4_i + CL_i + NA_i + OIN_i], \quad (2)$$

where  $i$  denotes the bin number in the MOSAIC aerosol scheme, where the first three bins consist of the PM<sub>2.5</sub> total, and BC, OC, SO<sub>4</sub>, NO<sub>3</sub>, NH<sub>4</sub>, NA, CL, and OIN denote black carbon, organic compounds, sulfate, nitrate, ammonium, sodium, chloride and other inorganic compounds, respectively. This formula is identical to that used in the WRF/Chem MOSAIC scheme to diagnose PM<sub>2.5</sub>. The WRF-Chem-simulated aerosol mixing ratios of the species listed inside the brackets of Eq. 2 are in units of  $\mu\text{g kg}^{-1}$ , and thus, the dry air density  $\rho_d$  is multiplied to convert the units into  $\mu\text{g m}^{-3}$  for consistency with the observations.



1 Since only surface  $PM_{2.5}$  total mass observations were assimilated to analyze the 3D mass mixing ratios  
2 of 24 aerosol variables, the 3DVAR problem was underconstrained. Due to the lack of species and vertical  
3 information provided by the observations, the only mathematical solution is to utilize prior information from  
4 the model background. In the GSI system, the distribution of the analysis increments (the difference between  
5 the analysis and background) onto the different species was mostly model driven with the observation and  
6 background error covariance matrices acting as the main constraints. This speciated approach to aerosol DA  
7 within a variational system was introduced by Liu11 and further applied by S12 and Jiang13. By using  
8 individual aerosol species as the control variables, no assumptions were made regarding the contribution of  
9 each species' mass to the total aerosol mass or to the shapes of the vertical profiles.

## 10 2.2.2 $PM_{2.5}$ observations and errors

11 Hourly surface  $PM_{2.5}$  observations for January 2015-2017 were obtained from the China National  
12 Environmental Monitoring Center (CNEMC). There are 1600+ sites in our modeling domain. As the 1600+  
13 monitoring sites fall into 531 model grids, all observations within the same grid are averaged (as well as the  
14 latitude and longitude) for the purpose of performing statistical calculations and evaluation. The observation  
15 sites (Fig. 3) span mostly northern, central and eastern China, while the sites are relatively sparse in western  
16 China.

17 The observation error covariance matrix  $\mathbf{R}$  in Eq. (1) contains both measurement and representativeness  
18 errors. Pagowski *et al.* (2010) used a measurement error ( $\epsilon_0$ ) of  $2 \mu\text{g m}^{-3}$ . To associate higher  $PM_{2.5}$  values  
19 with larger measurement errors, S12 defined the measurement error as  $\epsilon_0 = 1.5 + 0.0075 \times M_{PM_{2.5}}$ , where  
20  $M_{PM_{2.5}}$  denotes an AIRNow  $PM_{2.5}$  observation and the units of each term are  $\mu\text{g m}^{-3}$ . According to the  $PM_{2.5}$   
21 Auto-Monitoring Instrument Technical Standard and Requirement (China National Environmental Monitoring  
22 Center, 2013), three continuous online monitoring methods, namely, a beta-ray plus dynamic heating system,  
23 a beta-ray plus dynamic heating system plus light scattering system, and a tapered element oscillating  
24 microbalance plus filter dynamic measurement system, are used at the national monitoring sites to satisfy the

requirements that the display resolution should be less than  $1 \mu\text{g m}^{-3}$  and the error should be less than  $5 \mu\text{g m}^{-3}$  (within 24 hours). To reflect the confidence in the hourly observations, the measurement error  $\varepsilon_0$  in this study is defined as  $\varepsilon_0 = 1.0 + 0.0075 \times M_{PM_{2.5}}$ , where  $M_{PM_{2.5}}$  denotes a  $PM_{2.5}$  observational value (unit:  $\mu\text{g m}^{-3}$ ).

Representativeness errors reflect the inaccuracies in the forward operator and in the interpolation from the model grid to the observation location. Elbern *et al.* (2007), Pagowski *et al.* (2010), S12 and Jiang13 defined the representativeness error ( $\varepsilon_r$ ) as

$$\varepsilon_r = \gamma \varepsilon_0 \sqrt{\frac{\Delta x}{L}}, \quad (3)$$

where  $\gamma$  is an adjustable parameter scaling  $\varepsilon_0$  ( $\gamma = 0.5$  was used here),  $\Delta x$  is the grid spacing (40 km in our case) and  $L$  is the radius of influence of an observation (set to 2 km for urban sites). These parameter settings were based on the performance of sensitivity tests. The total  $PM_{2.5}$  error ( $\varepsilon_{PM_{2.5}}$ ) is defined as

$$\varepsilon_{PM_{2.5}} = \sqrt{\varepsilon_0^2 + \varepsilon_r^2}, \quad (4)$$

which constituted the diagonal elements in the  $\mathbf{R}$  matrix. The  $PM_{2.5}$  data were provided in near-real time without any data quality control. To ensure the data quality before DA,  $PM_{2.5}$  observational values larger than  $1000 \mu\text{g m}^{-3}$  (the maximum display limit of the monitoring system) were deemed unrealistic in the filter process and thus were not assimilated. In addition, observations leading to innovations/deviations (observations minus the model-simulated values determined from the first-guess fields) exceeding  $500 \mu\text{g m}^{-3}$  were also omitted for the stability of the DA optimization step.

### 2.2.3 Background error covariance

Similar to Jiang13, the background error covariance (BEC) statistics for each analysis variable required by the 3DVAR algorithm were computed by utilizing the NMC method (Parrish and Derber, 1992) based upon the one-month WRF/Chem forecast for January 2015. No cross-correlation between different species was considered. The standard deviations and horizontal/vertical correlation length scales of the background errors (separated for each aerosol species) were calculated using the method described by Wu *et al.* (2002). These

1 data were used as constraints for the distributions of the PM components. It is important to have phenomena-  
2 specific background error statistics to allow for an appropriate adjustment of individual species. The domain-  
3 averaged standard deviations of the background errors for 6 aerosol species (BC, OC, SO<sub>4</sub>, NO<sub>3</sub>, NH<sub>4</sub>, and  
4 OIN) in the first three size bins are shown in Fig. 1 as a function of the vertical model level; CL and NA are  
5 not shown here because they are excessively small relative to the other PM species. By using the MOSAIC  
6 aerosol scheme, the characteristics of different aerosol species in different size bins are more appropriate for  
7 the China region in the model. As shown in Fig. 1, the standard deviations of different aerosol species errors  
8 are different in the three size bins; the errors of NO<sub>3</sub>, OIN and SO<sub>4</sub> are relatively larger than those of the other  
9 species in the three size bins; OC is also important, especially in the second (0.1-1.0 μm) and third (1.0-  
10 2.5 μm) size bins. The larger background errors of those species allowed the field to be better adjusted, which  
11 was crucial for the aerosol analyses in this study.

## 12 **2.3 Experimental design**

13 We conducted two sets of experiments (NO\_DA and CONC\_DA) for January 2015, 2016 and 2017. In  
14 both cases, the MEIC\_2010 emission inventory was used. The NO\_DA experiment initialized a new  
15 WRF/Chem forecast every 6 hr starting at 00 UTC on 20 December of the previous year to spin up the aerosol  
16 fields and was run through 23 UTC on 31 January. Only the simulations in January were used for the analysis.  
17 In the NO\_DA experiment, the chemical/aerosol fields were simply carried over from cycle to cycle (similar  
18 to a continuous aerosol forecast), while the meteorological IC/BC were updated from GFS analysis data every  
19 6 hr to prevent the meteorological simulation from drifting. For CONC\_DA, the GSI 3DVAR system updated  
20 the MOSAIC aerosol variables every hour starting from 00 UTC on 1 January. The background of the first  
21 cycle at 00 UTC on 1 January was obtained from the NO\_DA experiment, and all subsequent cycle were  
22 derived from the previous cycle's 1-hr forecast. In CONC\_DA, the GFS analysis data were interpolated from  
23 a 6-hr frequency to a 1-hr frequency and were then used to update the meteorological IC/BC in each 1-hr cycle.  
24 The newly added heterogeneous reactions were activated in both sets of experiments.

## 2.4 Distinguishing the impacts of meteorological conditions and emissions

As introduced in section 1, interannual air quality changes are strongly influenced by both emissions and meteorological conditions. It is challenging to distinguish and quantify the impacts of these two aspects solely based on observations or modeling. In our case, [the impacts of meteorological conditions are diagnosed by analyzing the differences between two sets of modeling simulations \(with the same emission inventory but different meteorology conditions\)](#). For NO\_DA, the emission inputs for January of the three years (2015-2017) were all from the MEIC\_2010 emission inventory, and the only differences among the simulations of these three months were the meteorological conditions, which were acquired from the GFS 6-hr analysis data. Therefore, we can assume that the differences in the simulated NO\_DA PM<sub>2.5</sub> concentrations among the three months were driven purely by differences in the meteorological conditions (similar to Xu *et al.* 2017). However, it is difficult to distinguish the impacts of emissions by using the same approach. As temporary emission control measures were applied according to the pollution severity (alarm level), the emission reduction ratios actually continued to change during the winter season, and thus, no exact emission reduction ratios were provided for those days. Nevertheless, the simulation approach with different emission scenarios is simply impossible when lacking exact emission reduction ratios. Instead, we subtracted the meteorological effects from the total effects by utilizing the reanalysis data and pure model simulations. The CONC\_DA result, in which the hourly surface PM<sub>2.5</sub> observations from 531 groups of sites were utilized, can be treated as a reanalysis dataset that reflects the actual conditions (very close to the observations). Therefore, the differences in the assimilated CONC\_DA PM<sub>2.5</sub> concentrations among the three months reflect the combined effects of both meteorological conditions and emissions. As the two experiments were generated on gridded aerosol fields, we can separate the effects of emissions from the collective effect by subtracting the NO\_DA differences from the CONC\_DA differences. Hence, we can better comprehend how meteorological conditions and emissions play different roles in driving the changes among the three years. Table 2 illustrates this approach by taking 2015 and 2016 as an example. However, some uncertainties might be associated with this approach, as will be discussed in detail in section 4.2.

1 **Table 2.** The approach used to distinguish the different impacts of meteorological conditions and emissions  
 2 by calculating them from different scenarios (taking 2015 and 2016 as an example).

|                                                           |                                                                  |                                                                                                                                                                                                  |
|-----------------------------------------------------------|------------------------------------------------------------------|--------------------------------------------------------------------------------------------------------------------------------------------------------------------------------------------------|
| A. Assimilated total changes                              | CONC_DA_2016-<br>CONC_DA_2015                                    | Reflecting the combined effect of all driving factors, e.g., emissions and meteorological conditions, from 2015 to 2016                                                                          |
| B. Simulated changes due to meteorological differences    | NO_DA_2016-<br>NO_DA_2015                                        | As NO_DA_2015 and NO_DA_2016 were conducted with same emissions but different meteorological conditions, the differences reflect the effects due to meteorological differences from 2015 to 2016 |
| C. Calculated changes due to emission differences = (A-B) | (CONC_DA_2016-<br>CONC_DA_2015) -<br>(NO_DA_2016-<br>NO_DA_2015) | Mostly reflecting the effects from emission differences between 2015 and 2016                                                                                                                    |

### 3. Evaluation of the assimilated PM<sub>2.5</sub>

4 This section presents the results from the NO\_DA and assimilation experiments outlined above. In slight  
 5 contrast to S12 and Jiang13, our purpose was to reproduce the spatial-temporal variations in the surface PM<sub>2.5</sub>  
 6 within the reanalysis dataset rather than to provide the IC of aerosol fields for improving forecasts.

7 Figure 3 shows the observed and modeled monthly averages of the surface PM<sub>2.5</sub> for January 2015, 2016  
 8 and 2017. [Nine](#) regions are illustrated as rectangles in the figure: North China Plain (NEC), northeastern China  
 9 (NEC), Energy Golden Triangle (EGT), Xinjiang (XJ), [Fenwei Plain \(FWP\)](#), Sichuan Basin (SB), Central  
 10 China (CC), Yangtze River Delta (YRD), and Pearl River Delta (YRD). Both the observations and the model  
 11 show that high values are mostly observed in NCP, [FWP](#), SB and CC. In the NO\_DA case, the model results  
 12 are overpredicted in SB, NCP and CC for all three months, while the overestimations are more severe in SB.  
 13 The NO\_DA case generally overestimates (underestimates) the surface PM<sub>2.5</sub> in NCP, SB and CC ([XJ and](#)  
 14 [FWP](#)) in the three years, potentially indicating that the 2010 emissions are not appropriate for the 2015-2017  
 15 simulations with overestimations (underestimations). [As discussed in section 2.1, the large area of](#)  
 16 [overestimation is consistent with the national reductions in SO<sub>2</sub>, NO<sub>x</sub> and PM<sub>2.5</sub> anthropogenic emissions](#)  
 17 [\(Zheng \*et al.\*, 2018\); however, the underestimations in XJ and FWP also indicate the introduction of new](#)  
 18 [emission sources to these two regions.](#)

1 Compared to the NO\_DA case, the CONC\_DA assimilation experiment effectively reproduces the spatial  
2 distribution of surface PM<sub>2.5</sub> for the three months in terms of the relatively higher values observed in NCP, SB  
3 and CC and in some “hot spots” (NEC, FWP, and XJ), which are closer to the observations.

4 Basic statistical measures, including the bias (BIAS), standard deviation (STDV), root-mean-square error  
5 (RMSE) and correlation coefficient (CORR), were applied to evaluate the experiments. Figure 4 shows the  
6 time series of the BIAS, STDV and RMSE for all the data used in the entire domain. The statistics were  
7 calculated for each 1-hr DA cycle. After quality control, the number of PM<sub>2.5</sub> observations used in the DA  
8 process differed; the number of observations was normally approximately 500-520 but reached a minimum of  
9 320-450 occasionally due to the data availability. From the time series, we can see that the BIAS, STDV and  
10 RMSE are greatly improved in the CONC\_DA case. The maximum BIAS values are approximately 50 μg m<sup>-3</sup>  
11 for January 2015 and approximately 80 μg m<sup>-3</sup> for 2016 and 2017 in NO\_DA, while they are reduced to  
12 approximately ±5 μg m<sup>-3</sup> in CONC\_DA. The STDV and RMSE are also reduced by at least 50% most of  
13 the time.

14 Figure 5 shows the spatial distributions of the error statistics (BIAS, RMSE and CORR) at each  
15 observational site (with more than 2/3 valid data in the month) in January 2015, 2016 and 2017. We start with  
16 2015 and then address the differences with comparisons in 2016 and 2017. In 2015 in the NO\_DA case, the  
17 surface PM<sub>2.5</sub> concentrations are generally overestimated by 20-60 μg m<sup>-3</sup> in eastern China (NCP, SB, CC,  
18 PRD and YRD) but are underestimated in NEC, FWP, EGT and especially XJ. The high/low BIAS values in  
19 eastern/western China are greatly corrected in CONC\_DA. Consistent with the BIAS changes in CONC\_DA,  
20 the RMSE and CORR distributions in eastern China and NEC are also greatly improved; the RMSE is reduced  
21 by at least 50%, and the CORR increases to almost above 0.8-0.9. The inhomogeneous distributions of the  
22 BIAS in NO\_DA in 2016 and 2017 are very similar to that in 2015 (overestimated in eastern China but  
23 underestimated in NEC, EGT and XJ). However, the high biases in CC and PRD and the low biases in XJ are  
24 even larger in 2016 and 2017. Similar to the comparisons between NO\_DA and CONC\_DA for the year 2015,  
25 improvements are generally achieved for almost all the regions in both 2016 and 2017. The statistics for the 9

1 regions are listed in Table 3.

2 **Table 3.** Statistics of the observed and model-simulated surface PM<sub>2.5</sub> for January 2015, 2016 and 2017 in 9  
3 regions (units are  $\mu\text{g m}^{-3}$  for BIAS and RMSE).

| Statistics | Sites | Pairs of data | BIAS   |         | RMSE   |         | CORR  |         |
|------------|-------|---------------|--------|---------|--------|---------|-------|---------|
|            |       |               | NO_DA  | CONC_DA | NO_DA  | CONC_DA | NO_DA | CONC_DA |
| 2015       |       |               |        |         |        |         |       |         |
| NCP        | 67    | 46699         | 19.38  | 2.08    | 68.09  | 24.26   | 0.72  | 0.96    |
| NEC        | 30    | 20910         | -11.94 | -1.04   | 49.47  | 21.11   | 0.59  | 0.93    |
| EGT        | 28    | 19516         | -40.43 | 5.28    | 60.62  | 19.45   | 0.37  | 0.90    |
| XJ         | 19    | 13243         | -53.76 | 4.16    | 71.69  | 19.74   | 0.40  | 0.94    |
| FWP        | 27    | 18819         | 4.05   | 1.75    | 56.71  | 23.05   | 0.63  | 0.93    |
| SB         | 48    | 33456         | 98.02  | 0.61    | 125.76 | 20.76   | 0.55  | 0.94    |
| CC         | 49    | 34153         | 46.94  | -0.38   | 81.31  | 21.18   | 0.46  | 0.93    |
| YRD        | 34    | 23698         | 32.22  | -0.43   | 59.90  | 15.14   | 0.73  | 0.96    |
| PRD        | 20    | 13940         | 19.36  | -0.03   | 47.81  | 9.10    | 0.24  | 0.95    |
| 2016       |       |               |        |         |        |         |       |         |
| NCP        | 67    | 46699         | 20.90  | 1.41    | 57.77  | 20.74   | 0.78  | 0.96    |
| NEC        | 30    | 20910         | -11.05 | 0.04    | 40.91  | 16.08   | 0.57  | 0.94    |
| EGT        | 28    | 19516         | -22.55 | 0.69    | 39.63  | 13.75   | 0.42  | 0.90    |
| XJ         | 19    | 13243         | -72.92 | 0.25    | 98.19  | 27.16   | 0.51  | 0.96    |
| FWP        | 27    | 18819         | -3.51  | 1.51    | 62.04  | 26.01   | 0.76  | 0.94    |
| SB         | 48    | 33456         | 134.63 | 2.77    | 165.38 | 15.49   | 0.51  | 0.92    |
| CC         | 49    | 34153         | 86.28  | 1.89    | 109.09 | 18.76   | 0.46  | 0.92    |
| YRD        | 34    | 23698         | 46.13  | 1.03    | 62.11  | 13.40   | 0.73  | 0.95    |
| PRD        | 20    | 13940         | 59.79  | 2.05    | 74.76  | 6.51    | 0.04  | 0.91    |
| 2017       |       |               |        |         |        |         |       |         |
| NCP        | 67    | 46699         | 25.75  | 2.35    | 82.31  | 28.91   | 0.74  | 0.95    |
| NEC        | 30    | 20910         | -11.38 | 0.01    | 53.38  | 21.35   | 0.64  | 0.94    |
| EGT        | 28    | 19516         | -26.88 | 1.40    | 48.83  | 16.96   | 0.41  | 0.90    |
| XJ         | 19    | 13243         | -95.92 | 3.82    | 125.09 | 35.65   | 0.51  | 0.96    |
| FWP        | 27    | 18819         | -6.78  | -1.02   | 89.26  | 31.69   | 0.65  | 0.94    |
| SB         | 48    | 33456         | 122.82 | 2.33    | 149.08 | 20.08   | 0.56  | 0.93    |
| CC         | 49    | 34153         | 101.22 | 3.49    | 132.97 | 19.50   | 0.23  | 0.92    |
| YRD        | 34    | 23698         | 59.31  | 2.40    | 78.02  | 12.32   | 0.63  | 0.93    |
| PRD        | 20    | 13940         | 35.01  | 0.04    | 61.84  | 9.55    | -0.16 | 0.94    |

4

5

#### 6 **4. Interannual changes during 2015 through 2017**

7 Given reliable PM<sub>2.5</sub> reanalysis fields produced by assimilating surface PM<sub>2.5</sub> (CONC\_DA), the change  
8 trends among the three years can be analyzed for not only scattered observational sites but also different

1 regions. To distinguish the roles of meteorological conditions and emissions in driving these changes, an  
2 analysis based on the NO\_DA and CONC\_DA simulations is performed. As assumed in section 2.4,  
3 meteorology-driven changes can be analyzed in the NO\_DA simulations with different meteorological  
4 conditions but the same emission inventory for different years; however, the changes in the reanalysis data  
5 among different years are actually the combination of all the driving forces, including meteorological  
6 conditions and emissions. By analyzing both sets of simulations, we can attempt to distinguish the roles of  
7 meteorology and emissions in determining these changes.

#### 8 **4.1 Spatial distribution**

9 The monthly mean PM<sub>2.5</sub> differences for January in the three years (2015-2017) are shown in Fig. 6 in  
10 terms of the surface concentrations measured at observational sites (Fig. 6a) and those from assimilation  
11 experiments (Fig. 6b). The surface observations are mostly reduced from 2015 to 2016 except for a few sites  
12 in the southern parts of NCP and FWP and in XJ. For the changes from 2016 to 2017, the surface observations  
13 increase at almost all the sites, especially the sites in the southern part of NCP; the only exceptions are the  
14 sites along the coastline in YRD. The assimilated (CONC\_DA) differences are consistent with the surface  
15 observations inasmuch that the decreasing trend from 2015 to 2016 and the increasing trend from 2016 to  
16 2017 for most of the regions are reproduced. However, for the changes in Tibet, EGT and XJ, where  
17 observational sites are sparse, some “cold spots” were artificially generated by CONC\_DA due to the scarcity  
18 of data and the horizontal length scale set in the assimilation. As already shown in Fig. 3 and indicated here  
19 again, January 2016 is the cleanest month among the three years.

#### 21 **4.2 The roles of meteorological conditions and emissions**

22 The surface PM<sub>2.5</sub> concentrations from both the observations and the assimilation experiments show a  
23 decreasing trend from 2015 to 2016 but an increasing trend from 2016 to 2017 for most of the regions in  
24 eastern China (Fig. 6). The Chinese government has implemented a strict emission control strategy since 2013,  
25 especially in northern China, and thus, emission reductions are expected for each year following 2013. The



1 ambient response from 2015-2017 is contradictory if considering only the reductions in emissions and  
 2 omitting the changes in meteorological conditions. There are two possible assumptions: the first is that the  
 3 emission reduction target was not achieved from 2016 to 2017, and the second is that other factors in addition  
 4 to emissions played more important roles.

5 The NO<sub>2</sub> differences among the different years are shown in Fig. 6c, which reflects the effect of  
 6 meteorological condition changes (section 2.4). The effect due to emissions (the other major factor in addition  
 7 to meteorological conditions) is given by subtracting the NO<sub>2</sub> differences from the CONC<sub>2</sub> differences  
 8 (Fig. 6d). We can clearly see that the meteorology played two different roles from 2016 to 2017. It caused a  
 9 decrease in the ambient concentrations for northern China (NCP and NEC) from 2015 to 2016 but induced a  
 10 large increase for northern and central China (CC) from 2016 to 2017. This indicates that the meteorological  
 11 conditions might have differed from 2016 to 2017. After considering the impacts of meteorological conditions,  
 12 those of emission reductions are still confirmed for these two regions from 2016 to 2017. The contributions  
 13 from both meteorological conditions and emissions in the 9 regions (defined in Fig. 3) were calculated, and  
 14 the results are listed in Table 4. The calculations show a reduction of approximately 15-20  $\mu\text{g m}^{-3}$  in PM<sub>2.5</sub> for  
 15 the month of January from 2015 to 2016 in northern China (NCP and NEC), but the meteorology played a  
 16 dominant role (contributing a reduction of approximately 12-21  $\mu\text{g m}^{-3}$  in PM<sub>2.5</sub>). The changes from 2016 to  
 17 2017 in NCP and NEC are completely different; meteorological conditions caused an increase in PM<sub>2.5</sub> of  
 18 approximately 12-23  $\mu\text{g m}^{-3}$ , and emission control measures caused a decrease of 1-8  $\mu\text{g m}^{-3}$  in PM<sub>2.5</sub>, while the  
 19 combined effects still showed a PM<sub>2.5</sub> increase for that region. It is reasonable to say that emissions were  
 20 indeed reduced for the northern regions from 2016 to 2017. However, the meteorology played an important  
 21 role in offsetting those emission reductions and leading to an increase in surface concentrations in 2017.

22  
 23 **Table 4.** Modeled ambient PM<sub>2.5</sub> concentration changes for 2016-2015, 2017-2016 and 2017-2015 in 9  
 24 regions and the contributions of the meteorology (MET) and emissions (EMIS) calculated according to  
 25 Table 2. Units:  $\mu\text{g m}^{-3}$ .

|  | 2016-2015 | 2017-2016 | 2017-2015 |
|--|-----------|-----------|-----------|
|--|-----------|-----------|-----------|

|     | Total  | MET    | EMIS   | Total  | MET    | EMIS   | Total  | MET    | EMIS   |
|-----|--------|--------|--------|--------|--------|--------|--------|--------|--------|
| NCP | -15.23 | -12.52 | -2.71  | +14.91 | +23.16 | -8.25  | -0.31  | +10.65 | -10.96 |
| NEC | -20.09 | -21.23 | +1.14  | +11.44 | +12.61 | -1.18  | -8.66  | -8.62  | -0.04  |
| EGT | -21.69 | 1.68   | -23.37 | +4.86  | +3.81  | +1.05  | -16.83 | +5.48  | -22.31 |
| XJ  | +3.69  | +0.07  | +3.63  | +1.85  | +0.28  | +1.57  | +5.54  | +0.34  | +5.20  |
| FWP | -7.05  | -10.19 | +3.13  | +22.95 | +25.62 | -2.66  | +15.90 | +15.43 | +0.47  |
| SB  | -18.75 | +8.72  | -27.48 | +10.31 | +4.02  | +6.29  | -8.45  | +12.74 | -21.19 |
| CC  | -21.80 | +14.73 | -36.54 | +9.35  | +19.36 | -10.01 | -12.45 | +34.09 | -46.54 |
| YRD | -10.43 | -3.03  | -7.40  | -11.45 | -2.93  | -8.52  | -21.88 | -5.96  | -15.92 |
| PRD | -23.48 | 13.02  | -36.50 | +12.71 | -6.12  | +18.83 | -10.77 | +6.90  | -17.67 |

1 It is worth noting that there are uncertainties in the simulation/assimilation processes. There are three  
 2 sources of uncertainties in the NO<sub>DA</sub> simulation. First, the emission inventories in the NO<sub>DA</sub> simulations  
 3 are obviously not accurate, which may introduce uncertainties into the analysis. Although the basic assumption  
 4 required only that the emissions stay the same throughout the three years, emission inventory uncertainty-  
 5 induced errors would be offset in the subtraction process when calculating the year-to-year differences.  
 6 However it did generate uncertainties. For example, the emissions in SB, CC and PRD were generally  
 7 overestimated (Fig. 3), which means that the variations in the ambient concentration might have been  
 8 artificially amplified considering the meteorology impacts (Fig. 6c). In contrast, the emissions in XJ and FWP  
 9 were underestimated (Fig. 3), and thus, the changes in the ambient concentrations due to meteorological  
 10 conditions in these two regions might have diminished. From this point of view, if the fixed emissions are  
 11 more accurate in those years, the results would be more reliable. In the case where “real” emissions are not  
 12 available and the purpose is to evaluate the contribution of those emissions, uncertainties will be unavoidable  
 13 and should be emphasized carefully. Second, the meteorological IC/BC conditions in the NO<sub>DA</sub> simulations,  
 14 which were obtained from GFS 6-hr analysis data, also have uncertainties. The biases in meteorological  
 15 conditions might lead to uncertainties in the PM<sub>2.5</sub> analysis. Third, the deficiencies associated with the  
 16 chemistry in the model also generate uncertainties, including missing reactions and the inaccurate  
 17 parameterization of reactions. These three aspects all originate from the imperfections of current forward  
 18 models. From another perspective, the accuracy of the CONC<sub>DA</sub> assimilation experiment also affects the  
 19 analysis. For example, the assimilation artificially made some “code spots” in Tibet, EGT and XJ, where  
 20 observational sites are sparse; this could also induce biases. Finally, the contribution of aerosol-meteorology

1 feedback was not considered in our calculations. As noted by Gao *et al.* (2017), reduced aerosol feedbacks  
2 due to emission reductions accounted for approximately 10.9% of the total decrease in PM<sub>2.5</sub> concentrations  
3 in urban Beijing in their APEC study. In our current approach, this effect is integrated into the emissions in  
4 the subtracting process.

### 5 **4.3 Meteorological changes in 2016 and 2017**

6 It is interesting to see that meteorology played different roles in each of the three years. Here, we  
7 compared some meteorological parameters to explain the impacts of the meteorology. Differences in the  
8 monthly mean planetary boundary layer height (PBLH), surface pressure (PSFC), 2-meter temperature (T2),  
9 2-meter relative humidity (RH2) and 10-meter wind speed in different years are given in Fig. 7. [The statistics](#)  
10 [of the differences in these parameters in the 9 regions are listed in Table 5, which](#) shows that the changes in  
11 the PSFC and T2 for the periods 2015-2016 and 2016-2017 are different over the whole region. Comparing  
12 the parameters between 2015 and 2016, the pressure system is stronger, the temperature is lower, and the wind  
13 speed is larger in most regions in the latter; these conditions are favorable for the dispersion of pollution.  
14 However, there are some unfavorable conditions, including a lower PBLH and a higher RH (and thus, more  
15 heterogeneous reactions with the high RH) in northern and southern China, which may offset the impacts of  
16 high pressure systems and low temperatures. Therefore, the combined impacts of these meteorological  
17 parameters caused a decrease in the ambient concentration in northern China and an increase in southern China  
18 from 2015 to 2016, as shown in Fig. 6. The meteorological changes are different from 2016 to 2017 with a  
19 weaker pressure system, higher temperature, smaller wind speed, and lower PBLH in most regions, which  
20 caused the pollution to accumulate. As suggested by recent studies, climate change has had important impacts  
21 on extreme haze events in northern China based on historical statistical approaches or climate models. Those  
22 studies (e.g., Li *et al.*, 2015, Zuo *et al.*, 2015) revealed that wintertime fog-haze days across central and eastern  
23 China have a close relationship with the East Asian winter monsoon; in addition, significant weakening  
24 (strengthening) of the Siberian high and East Asian trough are the two main factors for extreme cold events  
25 and extreme warm events throughout China in winter, while warmth boosts air pollution. Consistent with our

1 study, Zhao *et al.* (2018) noted that a stronger Siberian high period in January 2016 produced a significant  
 2 decrease in PM<sub>2.5</sub> concentrations relative to those during weaker periods in other years. The abovementioned  
 3 studies emphasized that climate change factors and the impacts of emission changes are still difficult to  
 4 evaluate. Our study used the DA technique in combination with regional models and surface observations to  
 5 distinguish the impacts of emissions and meteorological conditions to further investigate the year-to-year  
 6 changes at the regional scale.

7 **Table 5.** Statistics of the meteorological differences by region for January 2015, 2016 and 2017.

|     | PBLH (meter)      |              |              | PSFC (Pa)    |              |              | T2 (degree)  |              |              | RH2 (%)      |              |              | WS10 (m/s)   |              |              |
|-----|-------------------|--------------|--------------|--------------|--------------|--------------|--------------|--------------|--------------|--------------|--------------|--------------|--------------|--------------|--------------|
|     | 2016<br>-<br>2015 | 2017<br>2016 | 2017<br>2015 | 2016<br>2015 | 2017<br>2016 | 2017<br>2015 | 2016<br>2015 | 2017<br>2016 | 2017<br>2015 | 2016<br>2015 | 2017<br>2016 | 2017<br>2015 | 2016<br>2015 | 2017<br>2016 | 2017<br>2015 |
| NCP | 27.9              | -26.7        | 1.2          | 138.5        | -30.2        | 108.4        | -4.9         | 3.3          | -1.6         | 3.0          | 5.1          | 8.1          | 1.15         | -0.78        | 0.37         |
| NEC | 22.7              | 35.3         | 58.0         | 117.0        | -58.7        | 58.3         | -4.9         | 4.4          | -0.5         | -5.7         | 3.1          | -2.6         | 0.96         | -0.38        | 0.57         |
| EGT | 13.6              | 1.1          | 14.7         | 28.0         | -8.4         | 19.7         | -4.0         | 4.0          | 0.0          | 10.0         | -14.9        | -4.9         | 0.14         | -0.50        | -0.36        |
| XJ  | -0.9              | -13.8        | -14.7        | 151.3        | -43.1        | 108.1        | -1.3         | -0.8         | -2.1         | 5.5          | -2.1         | 3.4          | 0.36         | -0.14        | 0.22         |
| FWP | 67.7              | -51.6        | 16.1         | 64.6         | -12.2        | 52.4         | -3.8         | 3.4          | -0.4         | 2.8          | -0.8         | 2.0          | 1.05         | -1.00        | 0.06         |
| SB  | 9.8               | -13.2        | -3.4         | -15.9        | 15.9         | 0.1          | -2.4         | 2.5          | 0.2          | 3.9          | -1.8         | 2.0          | 0.43         | -0.02        | 0.41         |
| CC  | 34.8              | -56.6        | -21.9        | 82.8         | -53.2        | 29.6         | -2.5         | 2.1          | -0.3         | 10.8         | 0.7          | 11.5         | 0.60         | -0.07        | 0.53         |
| YRD | 64.7              | -22.0        | 42.7         | 77.1         | -27.8        | 49.2         | -1.7         | 1.9          | 0.2          | 7.8          | 2.5          | 10.3         | 0.89         | -0.40        | 0.49         |
| PRD | -36.1             | 8.2          | -27.9        | -16.2        | -60.1        | -76.3        | -0.5         | 2.4          | 1.9          | 11.9         | -8.7         | 3.2          | 0.94         | -0.48        | 0.46         |

## 8 5. Conclusions

9 To analyze the complex PM<sub>2.5</sub> pollution in China, the GSI-WRF/Chem aerosol data assimilation system  
 10 was updated from the GOCART aerosol scheme to the MOSAIC-4BIN scheme, which is more appropriate  
 11 for characterizing anthropogenic emission-relevant aerosol species. Three years (2015-2017) of wintertime  
 12 (January) surface PM<sub>2.5</sub> observations from 1600+ sites were assimilated hourly using the updated 3DVAR  
 13 system in the CONC\_DA assimilation experiment. A parallel control experiment that did not employ DA  
 14 (NO\_DA) was also performed.

15 Both the control and the assimilation experiments were evaluated against the surface PM<sub>2.5</sub> observations.  
 16 In the NO\_DA experiment, in which the 2010\_MEIC emission inventory was used, the modeled PM<sub>2.5</sub> were  
 17 severely overestimated in the Sichuan Basin (SB), Central China (CC), Yangtze River Delta (YRD), and Pearl

1 River Delta (PRD) by 98-134, 46-101, 32-59, and 19-60  $\mu\text{g m}^{-3}$ , respectively, which indicated that the emission  
2 estimates for 2010 are not appropriate for 2015-2017, as strict emission control strategies were implemented  
3 in recent years. Meanwhile, underestimations of 11-12, 53-96, and 22-40  $\mu\text{g m}^{-3}$  were observed in northeastern  
4 China (NEC), Xinjiang (XJ) and the Energy Golden Triangle (EGT), respectively. The assimilation  
5 experiment significantly reduced the high biases of surface  $\text{PM}_{2.5}$  in SB, CC, YRD, and PRD and the low  
6 biases in NEC and XJ with biases within  $\pm 5 \mu\text{g m}^{-3}$ .

7 Both the observation and the assimilation experiments showed decreasing ambient concentrations from  
8 2015 to 2016 but increasing concentrations from 2016 to 2017 for most of the regions. To distinguish the  
9 important factors driving these changes, the reanalysis data from the assimilation experiment and the modeling  
10 results from the control experiment were analyzed. The results showed a reduction in  $\text{PM}_{2.5}$  of approximately  
11 15-20  $\mu\text{g m}^{-3}$  for the month of January from 2015 to 2016 in northern China (NCP and NEC), but meteorology  
12 played the dominant role (contributing approximately 12-21  $\mu\text{g m}^{-3}$  of the  $\text{PM}_{2.5}$  reduction). The changes from  
13 2016 to 2017 in NCP and NEC were different; meteorological conditions caused an increase in  $\text{PM}_{2.5}$  of  
14 approximately 12-23  $\mu\text{g m}^{-3}$ , while emission control measures caused a decrease of 1-8  $\mu\text{g m}^{-3}$ , and the  
15 combined effects still showed a  $\text{PM}_{2.5}$  increase for that region. The analysis confirmed that meteorology played  
16 different roles in 2016 and 2017: the higher pressure system, lower temperatures and higher PBLH in 2016  
17 (compared with 2015) were favorable for pollution dispersion, whereas the situation was almost the opposite  
18 in 2017 (compared with 2016) and led to an increased  $\text{PM}_{2.5}$  from 2016 to 2017, although emission control  
19 strategies were implemented in both years. After considering the impacts of the meteorology, the analysis  
20 showed that emissions were indeed reduced from 2015 to 2016 and 2017, especially in NCP for the year 2017  
21 (although the surface concentrations increased that year). The analysis also showed that emissions increased  
22 in XJ and FWP.

23 There are still large uncertainties in this approach, such as the deficiencies of forward models (including  
24 inaccurate emission inputs, uncertainties in the meteorological IC/BC, and the chemistry mechanism) and the  
25 assimilation process, and the imperfection of the aerosol-meteorology feedbacks in the model simulation

1 generated large biases in the analysis. The most straightforward approach is thus to directly estimate the  
2 emissions by data assimilation, which will be the topic of a separate study.

#### 4 **Acknowledgement**

5 This work was supported by the National Key R&D Program on Monitoring, Early Warning and  
6 Prevention of Major Natural Disasters under grant (2017YFC1501406), the National Natural Science  
7 Foundation of China (Grant No. 41807312) and Basic R&D special fund for central scientific research  
8 institutes (IUMKYSZHJ201701). NCAR is sponsored by US National Science Foundation.

#### 9 **References**

10 Chen, D., Liu, Z. Q., Fast, J., and Ban, J. M.: Simulations of sulfate-nitrate-ammonium (SNA) aerosols during  
11 the extreme haze events over northern China in October 2014, *Atmos. Chem. Phys.*, 16, 10707-10724, 10.5194/acp-  
12 16-10707-2016, 2016.

13 Chen, F., and Dudhia, J.: Coupling an advanced land surface-hydrology model with the Penn State-NCAR  
14 MM5 modeling system. Part I: Model implementation and sensitivity, *Mon. Weather Rev.*, 129, 569-585, 2001.

15 Cheng, Y., Zheng, G., Wei, C., Mu, Q., Zheng, B., Wang, Z., Gao, M., Zhang, Q., He, K., Carmichael, G.,  
16 Poschl, U., and Su, H.: Reactive nitrogen chemistry in aerosol water as a source of sulfate during haze events in  
17 China, *Sci. Adv.*, 2, e1601530, doi:10.1126/sciadv.1601530, 2016.

18 China National Environmental Monitoring Center, Ambient Air Quality Monthly Report 2015-01/2016-  
19 01/2017-01; <http://www.cnemc.cn/kqzlkbgbyb2092938.jhtml>.

20 China National Environmental Monitoring Center, PM2.5 Auto-Monitoring Instrument Technical Standard  
21 and Requirement, Beijing, 2013.

22 Chin, M., Savoie, D. L., Huebert, B. J., Bandy, A. R., Thornton, D. C., Bates, T. S., Quinn, P. K., Saltzman, E.  
23 S., and De Bruyn, W. J.: Atmospheric sulfur cycle simulated in the global model GOCART: Comparison with field  
24 observations and regional budgets, *J. Geophys. Res.-Atmos.*, 105, 24689-24712, doi:10.1029/2000jd900385, 2000.

25 Chin, M., Ginoux, P., Kinne, S., Torres, O., Holben, B. N., Duncan, B. N., Martin, R. V., Logan, J. A.,  
26 Higurashi, A., and Nakajima, T.: Tropospheric aerosol optical thickness from the GOCART model and comparisons  
27 with satellite and Sun photometer measurements, *J. Atmos. Sci.*, 59, 461-483, doi:10.1175/1520-  
28 0469(2002)059<0461:Taotft>2.0.Co;2, 2002.

29 Chou, M.-D., and M.J. Suarez.: An efficient thermal infrared radiation parameterization for use in general  
30 circulation models, NASA Tech. Memo., TM 104606, vol. 3, 25 pp., NASA Goddard Space Flight Cent., Greenbelt,  
31 Md. 1994

32 Collins, W. D., Rasch, P. J., Eaton, B. E., Khattatov, B. V., Lamarque, J. F., and Zender, C. S.: Simulating  
33 aerosols using a chemical transport model with assimilation of satellite aerosol retrievals: Methodology for  
34 INDOEX, *J. Geophys. Res.-Atmos.*, 106, 7313-7336, doi:10.1029/2000jd900507, 2001.

35 Elbern, H., Strunk, A., Schmidt, H., and Talagrand, O.: Emission rate and chemical state estimation by 4-

1 dimensional variational inversion, *Atmos Chem Phys*, 7, 3749-3769, DOI 10.5194/acp-7-3749-2007, 2007.

2 Fast, J. D., Gustafson, W. I., Easter, R. C., Zaveri, R. A., Barnard, J. C., Chapman, E. G., Grell, G. A., and  
3 Peckham, S. E.: Evolution of ozone, particulates, and aerosol direct radiative forcing in the vicinity of Houston  
4 using a fully coupled meteorology-chemistry-aerosol model, *J. Geophys. Res.-Atmos.*, 111, D21305,  
5 doi:10.1029/2005jd006721, 2006.

6 Gao, M., Liu, Z., Wang, Y., Lu, X., Ji, D., Wang, L., Li, M., Wang, Z., Zhang, Q., Carmichael, G. R.:  
7 Distinguishing the roles of meteorology, emission control measures, regional transport, and co-benefits of reduced  
8 aerosol feedbacks in "APEC Blue". *Atmos. Environ.*, 167, 476-486, doi:10.1016/j.atmosenv.2017.08.054, 2017.

9 Grell, G. A., Peckham, S. E., Schmitz, R., McKeen, S. A., Frost, G., Skamarock, W. C., and Eder, B.: Fully  
10 coupled "online" chemistry within the WRF model, *Atmos. Environ.*, 39, 6957-6975,  
11 doi:10.1016/j.atmosenv.2005.04.027, 2005.

12 Grell, G. A., and Devenyi, D.: A generalized approach to parameterizing convection combining ensemble and  
13 data assimilation techniques, *Geophys. Res. Lett.*, 29, Artn 1693. Doi 10.1029/2002gl015311, 2002.

14 Han, B., Zhang, R., Yang, W., Bai, Z., Ma, Z., and Zhang, W.: Heavy air pollution episodes in Beijing during  
15 January 2013: inorganic ion chemistry and source analysis using Highly Time-Resolved Measurements in an urban  
16 site, *Atmos. Chem. Phys. Discuss.*, 15, 11111-11141, doi:10.5194/acpd-15-11111-2015, 2015.

17 He, K.B., Multi-resolution emission Inventory for China (MEIC): model framework and 1990-2010  
18 anthropogenic emissions. In: Presented on the international Global Atmospheric Chemistry Conference, September  
19 17-21, Beijing, China 2012

20 Hong, C. P., Zhang, Q., He, K. B., Guan, D. B., Li, M., Liu, F., and Zheng, B.: Variations of China's emission  
21 estimates: response to uncertainties in energy statistics, *Atmos. Chem. Phys.*, 17, 1227-1239, 10.5194/acp-17-1227-  
22 2017, 2017.

23 Hong, S. Y., Noh, Y., and Dudhia, J.: A new vertical diffusion package with an explicit treatment of  
24 entrainment processes, *Mon. Weather Rev.*, 134, 2318-2341, 2006.

25 Jiang, Z., Z. Liu, T. Wang, C. S. Schwartz, H.-C. Lin, and F. Jiang.: Probing into the impact of 3DVAR  
26 assimilation of surface PM10 observations over China using process analysis, *J. Geophys. Res. Atmos.*, 118, 6738-  
27 6749, doi:10.1002/jgrd.50495, 2013.

28 Krotkov, N. A., McLinden, C. A., Li, C., Lamsal, L. N., Celarier, E. A., Marchenko, S. V., Swartz, W. H.,  
29 Bucsela, E. J., Joiner, J., Duncan, B. N., Boersma, K. F., Veefkind, J. P., Levelt, P. F., Fioletov, V. E., Dickerson, R.  
30 R., He, H., Lu, Z. F., and Streets, D. G.: Aura OMI observations of regional SO<sub>2</sub> and NO<sub>2</sub> pollution changes from  
31 2005 to 2015, *Atmos Chem Phys*, 16, 4605-4629, 10.5194/acp-16-4605-2016, 2016.

32 Liu, J., Han, Y., Tang, X., Zhu, J., Zhu, T.: Estimating adult mortality attributable to PM<sub>2.5</sub> exposure in China  
33 with assimilated PM<sub>2.5</sub> concentrations based on a ground monitoring network. *Sci. Total Environ.*, 568, 1253-1262,  
34 2016.

35 Liu, Z. Q., Liu, Q. H., Lin, H. C., Schwartz, C. S., Lee, Y. H., and Wang, T. J.: Three-dimensional variational  
36 assimilation of MODIS aerosol optical depth: Implementation and application to a dust storm over East Asia, *J.*  
37 *Geophys. Res.-Atmos.*, 116, Artn D23206. doi:10.1029/2011jd016159, 2011.

38 Lei, Y., Zhang, Q., He, K. B., and Streets, D. G.: Primary anthropogenic aerosol emission trends for China,  
39 1990-2005, *Atmos. Chem. Phys.*, 11, 931-954, 10.5194/acp-11-931-2011, 2011.

40 Li, M., Zhang, Q., Streets, D. G., He, K. B., Cheng, Y. F., Emmons, L. K., Huo, H., Kang, S. C., Lu, Z., Shao,  
41 M., Su, H., Yu, X., and Zhang, Y.: Mapping Asian anthropogenic emissions of non-methane volatile organic  
42 compounds to multiple chemical mechanisms, *Atmos. Chem. Phys.*, 14, 5617-5638, 10.5194/acp-14-5617-2014,  
43 2014.

1 Li, Q., Zhang, R. H., and Wang, Y.: Interannual variation of the wintertime fog-haze days across central and  
2 eastern China and its relation with East Asian winter monsoon, *Int. J. Climatol.*, 36, 346-354, 10.1002/joc.4350,  
3 2016.

4 Li, G., Bei, N., Cao, J., Huang, R., Wu, J., Feng, T., Wang, Y., Liu, S., Zhang, Q., Tie, X., and Molina, L. T.:  
5 A possible pathway for rapid growth of sulfate during haze days in China, *Atmos. Chem. Phys.*, 17, 3301-  
6 3316, doi:10.5194/acp-17-3301-2017, 2017.

7 McKeen, S. A., Wotawa, G., Parrish, D. D., Holloway, J. S., Buhr, M. P., Hubler, G., Fehsenfeld, F. C., and  
8 Meagher, J. F.: Ozone production from Canadian wildfires during June and July of 1995, *J. Geophys. Res.-Atmos.*,  
9 107, 4192, doi:10.1029/2001jd000697, 2002.

10 Mlawer, E. J., Taubman, S. J., Brown, P. D., Iacono, M. J., and Clough, S. A.: Radiative transfer for  
11 inhomogeneous atmospheres: RRTM, a validated correlated-k model for the longwave, *J. Geophys. Res.-Atmos.*,  
12 102, 16663-16682, 1997.

13 Moch, J. M., Dovrou, E., Mickley, L. J., Keutsch, F. N., Cheng, Y., Jacob, D. J., Jiang, J. K., Li, M., Munger,  
14 J. W., Qiao, X. H., and Zhang, Q.: Contribution of Hydroxymethane Sulfonate to Ambient Particulate Matter: A  
15 Potential Explanation for High Particulate Sulfur During Severe Winter Haze in Beijing, *Geophys Res Lett*, 45,  
16 11969-11979, 10.1029/2018gl079309, 2018.

17 Pagowski, M., Grell, G. A., McKeen, S. A., Peckham, S. E., and Devenyi D.: Three dimensional variational  
18 data assimilation of ozone and fine particulate matter observations: some results using the Weather Research and  
19 Forecasting-Chemistry model and Grid-point Statistical Interpolation, *Q. J. R. Meteorol. Soc.*, 136(653), 2010.

20 Sun, Y. L., Wang, Z. F., Du, W., Zhang, Q., Wang, Q. Q., Fu, P. Q., Pan, X. L., Li, J., Jayne, J., and Worsnop,  
21 D. R.: Long-term real-time measurements of aerosol particle composition in Beijing, China: seasonal variations,  
22 meteorological effects, and source analysis, *Atmos. Chem. Phys.*, 15, 10149-10165, 10.5194/acp-15-10149-2015,  
23 2015.

24 Schwartz, C. S., Z. Liu, H. C. Lin, and S. A. McKeen.: Simultaneous three-dimensional variational  
25 assimilation of surface fine particulate matter and MODIS aerosol optical depth, *J. Geophys. Res.-Atmos.*, 117,  
26 2012.

27 Shao, J., Chen, Q., Wang, Y., Lu, X., He, P., Sun, Y., Shah, V., Martin, R. V., Philip, S., Song, S., Zhao, Y., Xie,  
28 Z., Zhang, L., and Alexander, B.: Heterogeneous sulfate aerosol formation mechanisms during wintertime Chinese  
29 haze events: Air quality model assessment using observations of sulfate oxygen isotopes in Beijing, *Atmos. Chem.*  
30 *Phys. Discuss.*, <https://doi.org/10.5194/acp-2018-1352>, in review, 2019.

31 The Central People's Government of the People Republic of China. Guiding Opinions on Promoting the Joint  
32 Prevention and Control of Air Pollution to Improve Regional Air Quality, Beijing. 2010.

33 The Central People's Government of the People Republic of China. Atmospheric Pollution Prevention and  
34 Control Action Plan. 2013.

35 Wang, L. T., Wei, Z., Yang, J., Zhang, Y., Zhang, F. F., Su, J., Meng, C. C., and Zhang, Q.: The 2013 severe  
36 haze over southern Hebei, China: model evaluation, source apportionment, and policy implications, *Atmos. Chem.*  
37 *Phys.*, 14, 3151-3173, 10.5194/acp-14-3151-2014, 2014a.

38 Wang, W., Maenhaut, W., Yang, W., Liu, X. D., Bai, Z. P., Zhang, T., Claeys, M., Cachier, H., Dong, S. P., and  
39 Wang, Y. L.: One-year aerosol characterization study for PM<sub>2.5</sub> and PM<sub>10</sub> in Beijing, *Atmos. Pollut. Res.*, 5, 554-  
40 562, 10.5094/Apr.2014.064, 2014b.

41 Wang, Y. S., Yao, L., Wang, L. L., Liu, Z. R., Ji, D. S., Tang, G. Q., Zhang, J. K., Sun, Y., Hu, B., and Xin, J.  
42 Y.: Mechanism for the formation of the January 2013 heavy haze pollution episode over central and eastern China,  
43 *Sci. China Earth Sci.*, 57, 14-25, 10.1007/s11430-013-4773-4, 2014c.



1 Wang, G., Zhang, R., Gomez, M. E., Yang, L., Levy Zamora, M., Hu, M., Lin, Y., Peng, J., Guo, S., Meng, J.,  
2 Li, J., Cheng, C., Hu, T., Ren, Y., Wang, Y., Gao, J., Cao, J., An, Z., Zhou, W., Li, G., Wang, J., Tian, P., Marrero-  
3 Ortiz, W., Secretst, J., Du, Z., Zheng, J., Shang, D., Zeng, L., Shao, M., Wang, W., Huang, Y., Wang, Y., Zhu, Y., Li,  
4 Y., Hu, J., Pan, B., Cai, L., Cheng, Y., Ji, Y., Zhang, F., Rosenfeld, D., Liss, P. S., Duce, R. A., Kolb, C. E., and  
5 Molina, M. J.: Persistent sulfate formation from London Fog to Chinese haze, *Proc. Natl. Acad. Sci.*, 113,  
6 13630-13635, doi:10.1073/pnas.1616540113, 2016.

7 Wang, G., Zhang, F., Peng, J., Duan, L., Ji, Y., Marrero-Ortiz, W., Wang, J., Li, J., Wu, C., Cao, C., Wang, Y.,  
8 Zheng, J., Secretst, J., Li, Y., Wang, Y., Li, H., Li, N., and Zhang, R.: Particle acidity and sulfate production during  
9 severe haze events in China cannot be reliably inferred by assuming a mixture of inorganic salts, *Atmos. Chem.*  
10 *Phys.*, 18, 10123-10132, doi:10.5194/acp-18-10123-2018, 2018

11 Wild, O., Zhu, X., and Prather, M. J.: Fast-j: Accurate simulation of in- and below-cloud photolysis in  
12 tropospheric chemical models, *J. Atmos. Chem.*, 37, 245-282, 2000.

13 Xu, J., Chang, L., Yan, F., and He, J.: Role of climate anomalies on decadal variation in the occurrence of  
14 wintertime haze in the Yangtze River Delta, China. *Science of the Total Environment*, 599-600, 918-925,  
15 doi:10.1016/j.scitotenv.2017.05.015, 2017.

16 Yang, Y. R., Liu, X. G., Qu, Y., An, J. L., Jiang, R., Zhang, Y. H., Sun, Y. L., Wu, Z. J., Zhang, F., Xu, W. Q.,  
17 and Ma, Q. X.: Characteristics and formation mechanism of continuous hazes in China: a case study during the  
18 autumn of 2014 in the North China Plain, *Atmos. Chem. Phys.*, 15, 8165-8178, 10.5194/acp-15-8165-2015, 2015.

19 Zhang, L., Shao, J., Lu, X., Zhao, Y., Hu, Y., Henze, D. K., Liao, H., Gong, S., Zhang, Q.: Sources and  
20 Processes Affecting Fine Particulate Matter Pollution over North China: An Adjoint Analysis of the Beijing APEC  
21 Period. *Environ. Sci. Technol.*, 50, 8731-8740, 2016.

22 Zhang, Q., Streets, D. G., Carmichael, G. R., He, K. B., Huo, H., Kannari, A., Klimont, Z., Park, I. S., Reddy,  
23 S., Fu, J. S., Chen, D., Duan, L., Lei, Y., Wang, L. T., and Yao, Z. L.: Asian emissions in 2006 for the NASA  
24 INTEX-B mission, *Atmos. Chem. Phys.*, 9, 5131-5153, 2009.

25 Zaveri, R. A., and Peters, L. K.: A new lumped structure photochemical mechanism for large-scale  
26 applications, *J. Geophys. Res.-Atmos.*, 104, 30387-30415, 1999.

27 Zaveri, R. A., Easter, R. C., Fast, J. D., and Peters, L. K.: Model for Simulating Aerosol Interactions and  
28 Chemistry (MOSAIC), *J. Geophys. Res.-Atmos.*, 113, D13204, doi:10.1029/2007jd008782, 2008.

29 Zhao, S., Feng, T., Tie, X., Long, X., Li, G., Cao, J., Zhou, W., and An, Z.: Impact of Climate Change on  
30 Siberian High and Wintertime Air Pollution in China in Past Two Decades, *Earth's Future*, 6, 118-133,  
31 <https://doi.org/10.1002/2017EF000682>, 2018.

32 Zhao, Y., Zhou, Y. D., Qiu, L. P., and Zhang, J.: Quantifying the uncertainties of China's emission inventory  
33 for industrial sources: From national to provincial and city scales, *Atmos. Environ.*, 165, 207-221,  
34 10.1016/j.atmosenv.2017.06.045, 2017.

35 Zheng, B., Zhang, Q., Zhang, Y., He, K. B., Wang, K., Zheng, G. J., Duan, F. K., Ma, Y. L., and Kimoto, T.:  
36 Heterogeneous chemistry: a mechanism missing in current models to explain secondary inorganic aerosol formation  
37 during the January 2013 haze episode in North China, *Atmos. Chem. Phys.*, 15, 2031-2049, 10.5194/acp-15-2031-  
38 2015, 2015.

39 Zheng, B., Tong, D., Li, M., Liu, F., Hong, C. P., Geng, G. N., Li, H. Y., Li, X., Peng, L. Q., Qi, J., Yan, L.,  
40 Zhang, Y. X., Zhao, H. Y., Zheng, Y. X., He, K. B., and Zhang, Q.: Trends in China's anthropogenic emissions since  
41 2010 as the consequence of clean air actions, *Atmos Chem Phys*, 18, 14095-14111, 10.5194/acp-18-14095-2018,  
42 2018.

43 Zhi, G. R., Zhang, Y. Y., Sun, J. Z., Cheng, M. M., Dang, H. Y., Liu, S. J., Yang, J. C., Zhang, Y. Z., Xue, Z.

1 G., Li, S. Y., and Meng, F.: Village energy survey reveals missing rural raw coal in northern China: Significance in  
2 science and policy, *Environ. Pollut.*, 223, 705-712, 10.1016/j.envpol.2017.02.009, 2017.

3 Zuo, Z. Y., Zhang, R. H., Huang, Y., Xiao, D., and Guo, D.: Extreme cold and warm events over China in  
4 wintertime, *Int. J. Climatol.*, 35, 3568-3581, 10.1002/joc.4229, 2015.

5

## 2 Tables and Figures

3 **Table 1.** WRF/Chem model configuration.

4 **Table 2.** The approach used to distinguish the different impacts of meteorological conditions and emissions  
5 by calculating them from different scenarios (taking 2015 and 2016 as an example).

6 **Table 3.** Statistics of the observed and model-simulated surface PM<sub>2.5</sub> for January 2015, 2016 and 2017 in 9  
7 regions (units are  $\mu\text{g m}^{-3}$  for BIAS and RMSE).

8 **Table 4.** Modeled ambient PM<sub>2.5</sub> concentration changes for 2016-2015, 2017-2016 and 2017-2015 in 9 regions  
9 and the contributions of the meteorology (MET) and emissions (EMIS) calculated according to Table 2. Units:  
10  $\mu\text{g m}^{-3}$ .

11 **Table 5.** Statistics of the meteorological differences by region for January 2015, 2016 and 2017.

12 **Figure 1.** Domain-averaged standard deviations of the background errors ( $\mu\text{g kg}^{-1}$ ) as a function of the height  
13 for each aerosol variable in three bins: (a) Bin-01: 0.039-0.1  $\mu\text{m}$ ; (b) Bin-02: 0.1-1.0  $\mu\text{m}$ ; (c) Bin-03: 1.0-2.5  
14  $\mu\text{m}$ .

15 **Figure 2.** Spatial distribution of primary PM<sub>2.5</sub> (the sum of BC, OC, sulfate, nitrate and other unspecified  
16 PM<sub>2.5</sub> emissions), SO<sub>2</sub>, NO<sub>x</sub> and NH<sub>3</sub> emissions (units are  $\mu\text{g m}^{-2} \text{S}^{-1}$  for PM<sub>2.5</sub> and  $\text{mol km}^{-2} \text{hr}^{-1}$  for the other  
17 three) used in this study.

18 **Figure 3.** Observed and modeled monthly average PM<sub>2.5</sub> concentrations (unit:  $\mu\text{g m}^{-3}$ ) for January 2015 (left),  
19 2016 (middle) and 2017 (right). Regions defined in red rectangles are as follows: a-NCP (North China Plain),  
20 b-NEC (northeastern China), c-EGT (Energy Golden Triangle), d-XJ (Xinjiang), e-SB (Sichuan Basin), f-CC  
21 (Central China), g-YRD (Yangtze River Delta), and h-PRD (Pearl River Delta).

22 **Figure 4.** Time series of the statistics between the model simulations and observations. Red lines-  
23 CONC\_DA minus observations, blue lines -NO\_DA minus observations. Statistics include the number of  
24 data pairs for comparison, the MEAN-mean bias, the STDV- standard deviation, and the RMS-root mean  
25 square error. Left-2015, middle-2016, right-2017. (units are  $\mu\text{g m}^{-3}$  for MEAN, STDV and RMS).

26 **Figure 5.** Spatial distributions of the statistics between the model simulations and observations for January  
27 2015. Top: NO\_DA vs. observations, bottom: CONC\_DA vs. observations. BIAS-model minus observation,  
28 RMSE-root mean square error, CORR-correlation coefficient. (units are  $\mu\text{g m}^{-3}$  for BIAS and RMSE).

29 **Figure 6.** Observed and modeled ambient PM<sub>2.5</sub> concentration changes for January 2016-2015 (left), 2017-  
30 2016 (middle) and 2017-2015 (right). (a) Observations, (b) assimilated total changes, (c) modeled changes  
31 due to meteorological conditions, (d) calculated changes due to emissions. (Units:  $\mu\text{g m}^{-3}$ )

32 **Figure 7.** Modeled meteorological changes for 2016-2015 (left), 2017-2016 (middle) and 2017-2015 (right).  
33 (a) PBLH, (b) PSFC, (c) T2, (d) RH2 and (e) 10-m wind speed.

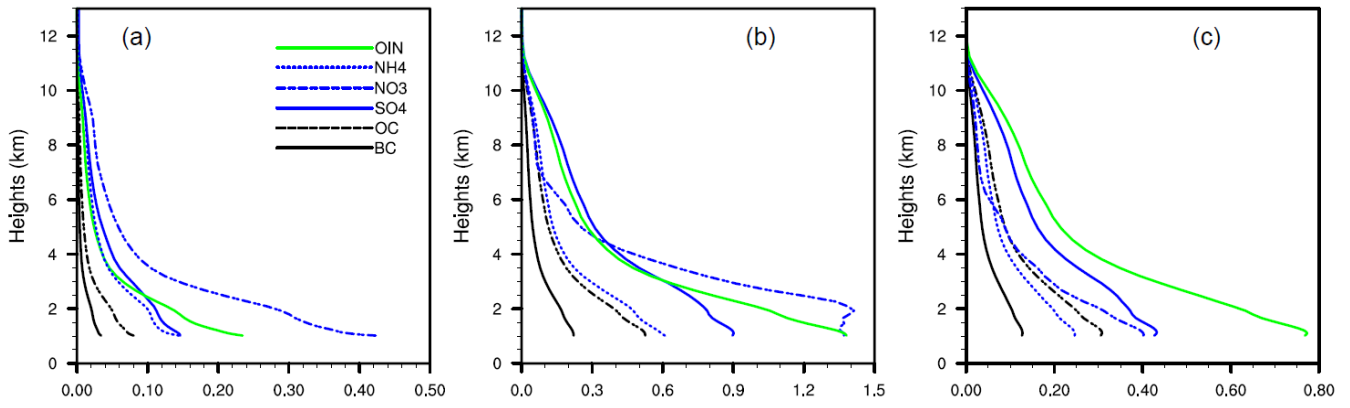

**Figure 1.** Domain-averaged standard deviations of the background errors ( $\mu\text{g kg}^{-1}$ ) as a function of the height for each aerosol variable in three bins: (a) Bin-01: 0.039-0.1  $\mu\text{m}$ ; (b) Bin-02: 0.1-1.0  $\mu\text{m}$ ; (c) Bin-03: 1.0-2.5  $\mu\text{m}$ .

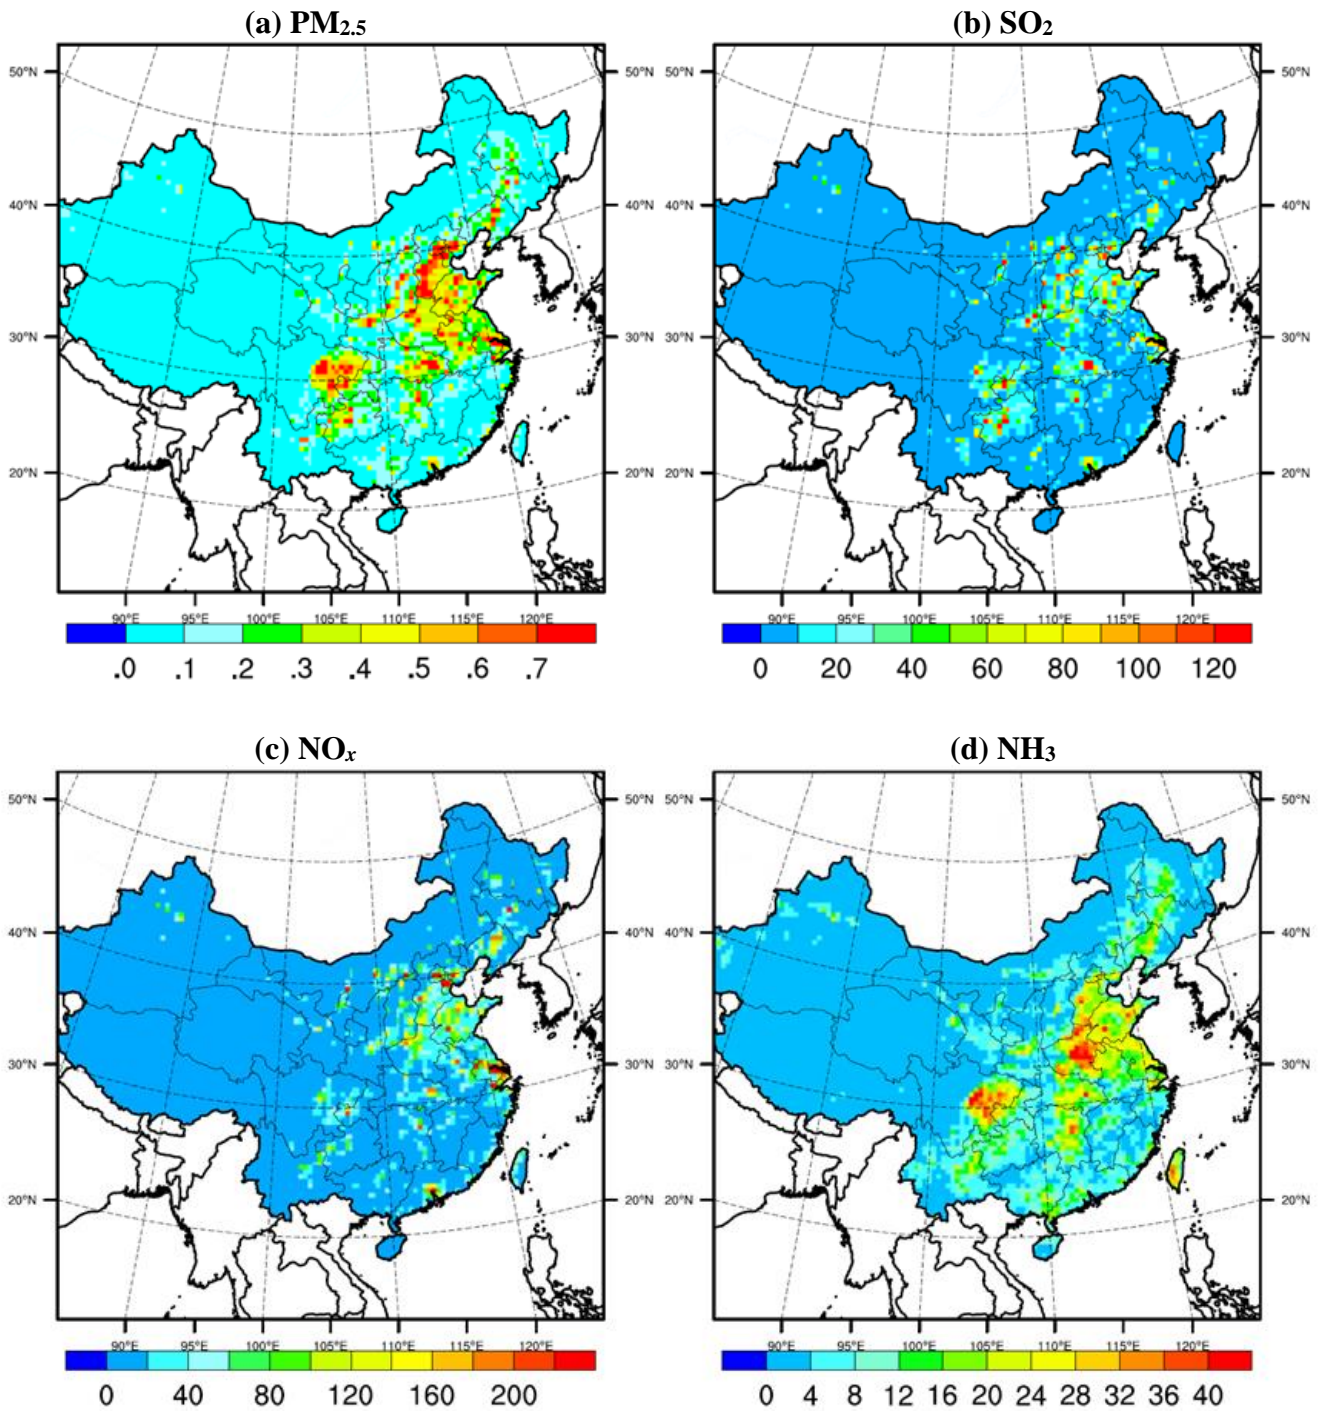

**Figure 2.** Spatial distribution of primary PM<sub>2.5</sub> (the sum of BC, OC, sulfate, nitrate and other unspecified PM<sub>2.5</sub> emissions), SO<sub>2</sub>, NO<sub>x</sub> and NH<sub>3</sub> emissions (units are  $\mu\text{g m}^{-2} \text{S}^{-1}$  for PM<sub>2.5</sub> and  $\text{mol km}^{-2} \text{hr}^{-1}$  for the other three) used in this study.

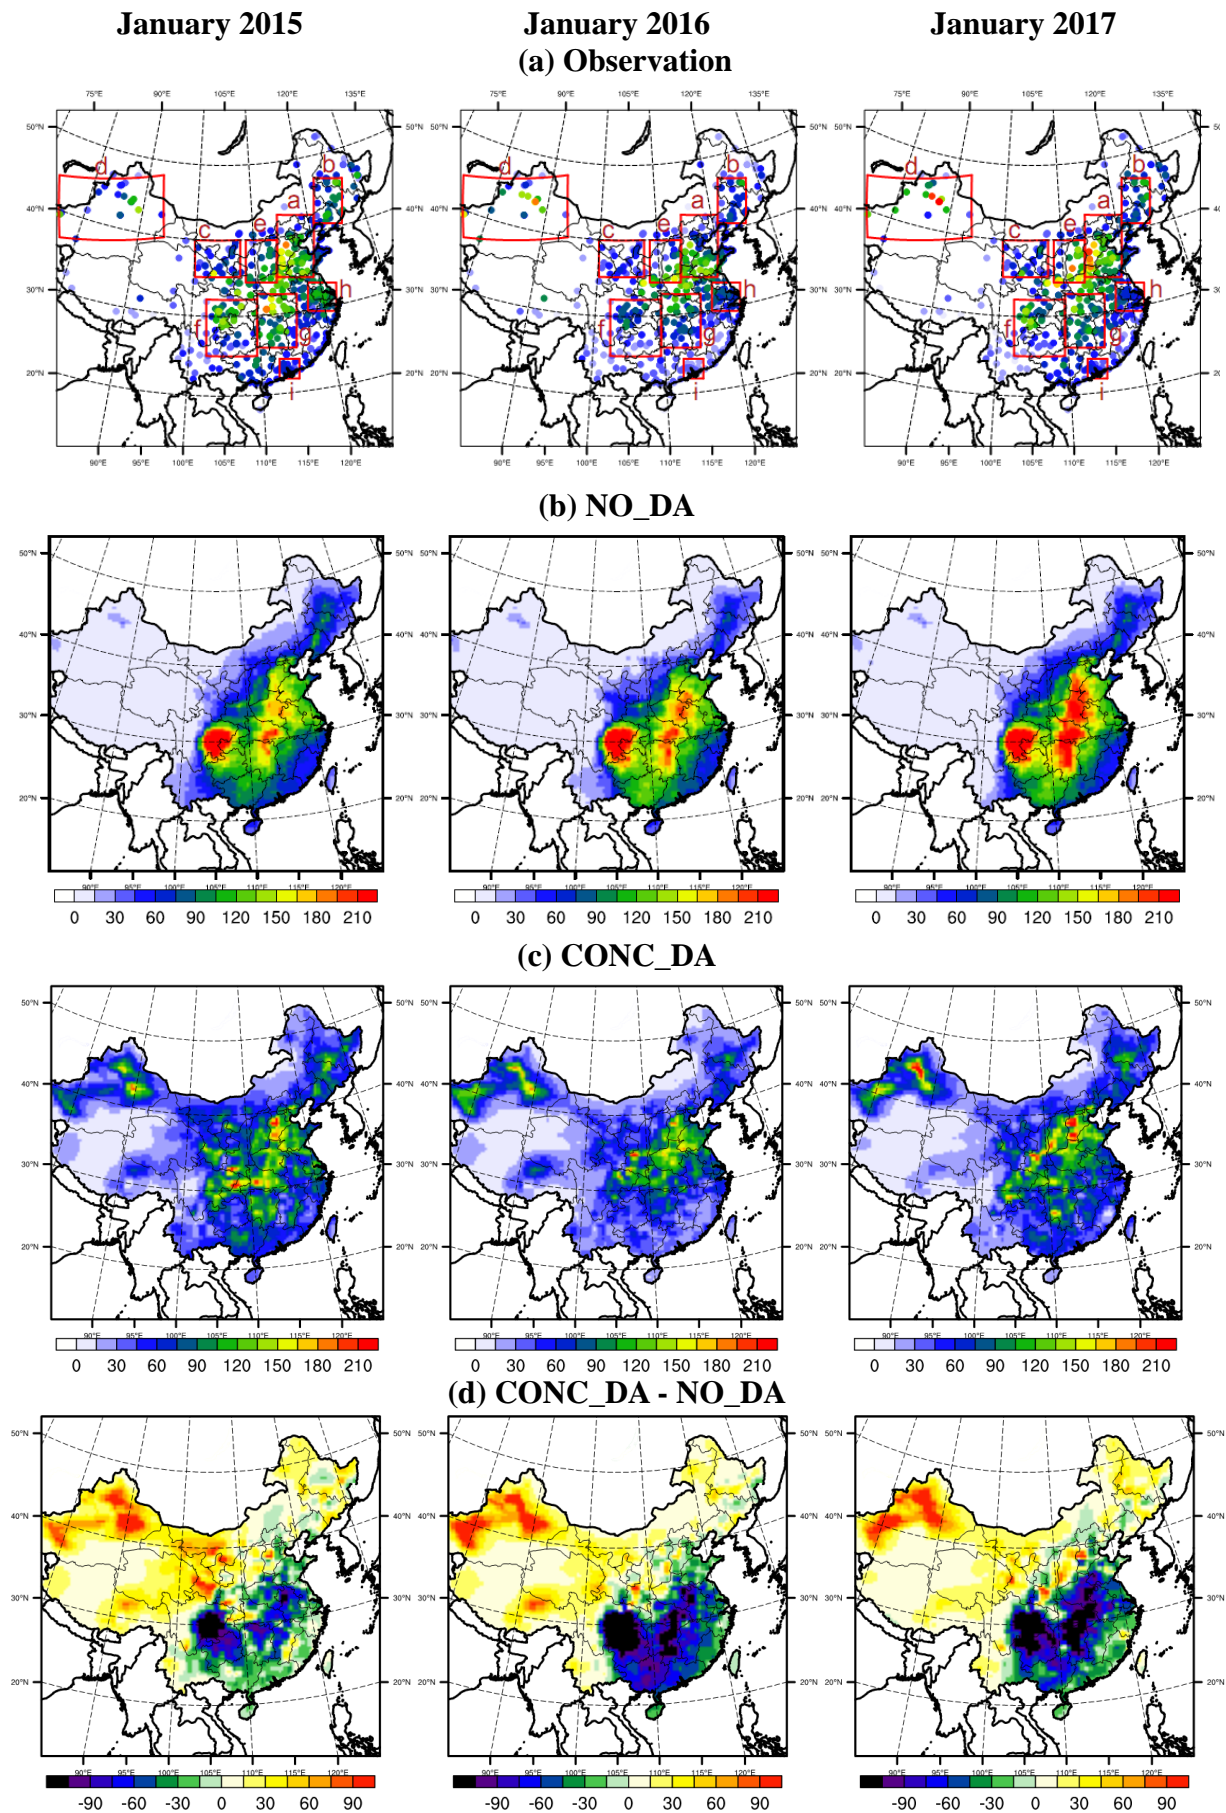

**Figure 3.** Observed and modeled monthly average  $PM_{2.5}$  concentrations (unit:  $\mu g m^{-3}$ ) for January 2015 (left), 2016 (middle) and 2017 (right). Regions defined in red rectangles are as follows: a-NCP (North China Plain), b-NEC (northeastern China), c-EGT (Energy Golden Triangle), d-XJ (Xinjiang), e-SB (Sichuan Basin), f-CC (Central China), g-YRD (Yangtze River Delta), and h-PRD (Pearl River Delta).

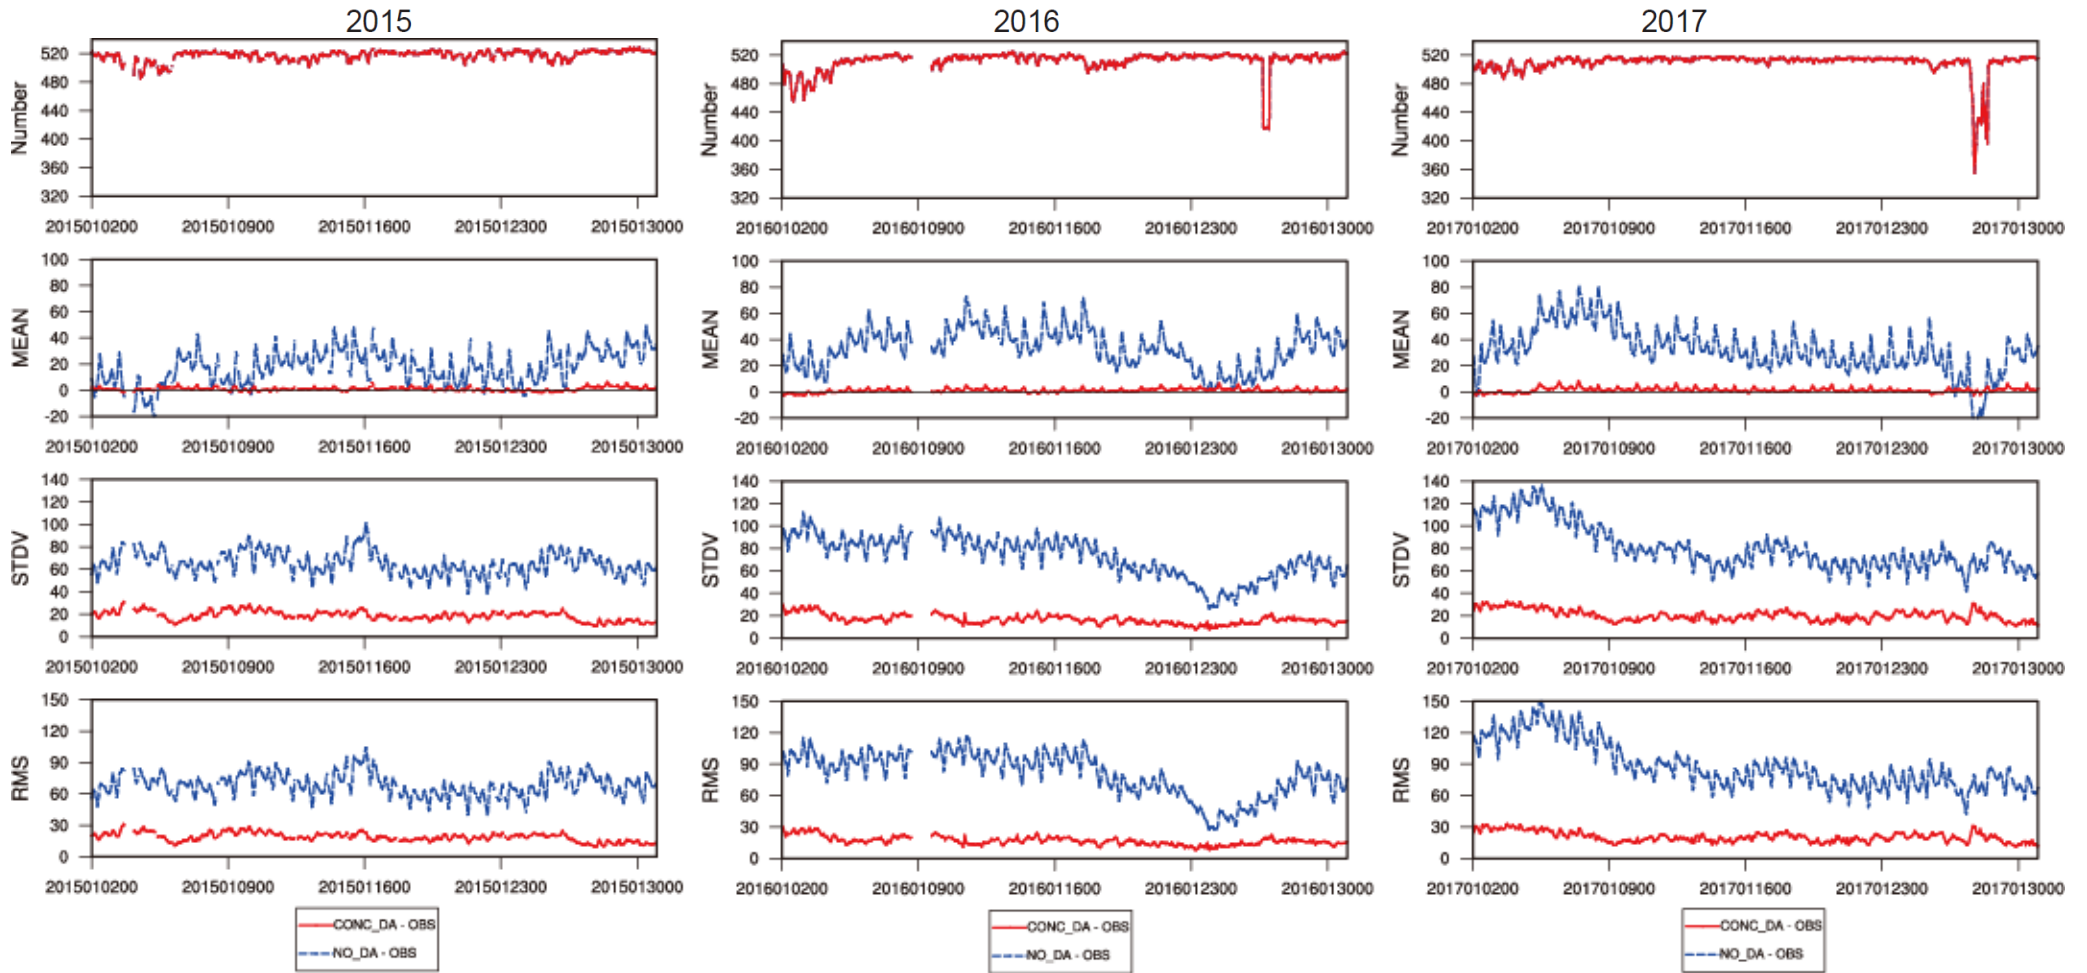

**Figure 4.** Time series of the statistics between the model simulations and observations. Red lines- CONC\_DA minus observations, blue lines -NO\_DA minus observations. Statistics include the number of data pairs for comparison, the MEAN-mean bias, the STDV- standard deviation, and the RMS-root mean square error. Left-2015, middle-2016, right-2017. (units are  $\mu\text{g m}^{-3}$  for MEAN, STDV and RMS).

(a). January 2015 - NO\_DA (top) and CONC\_DA (bottom)

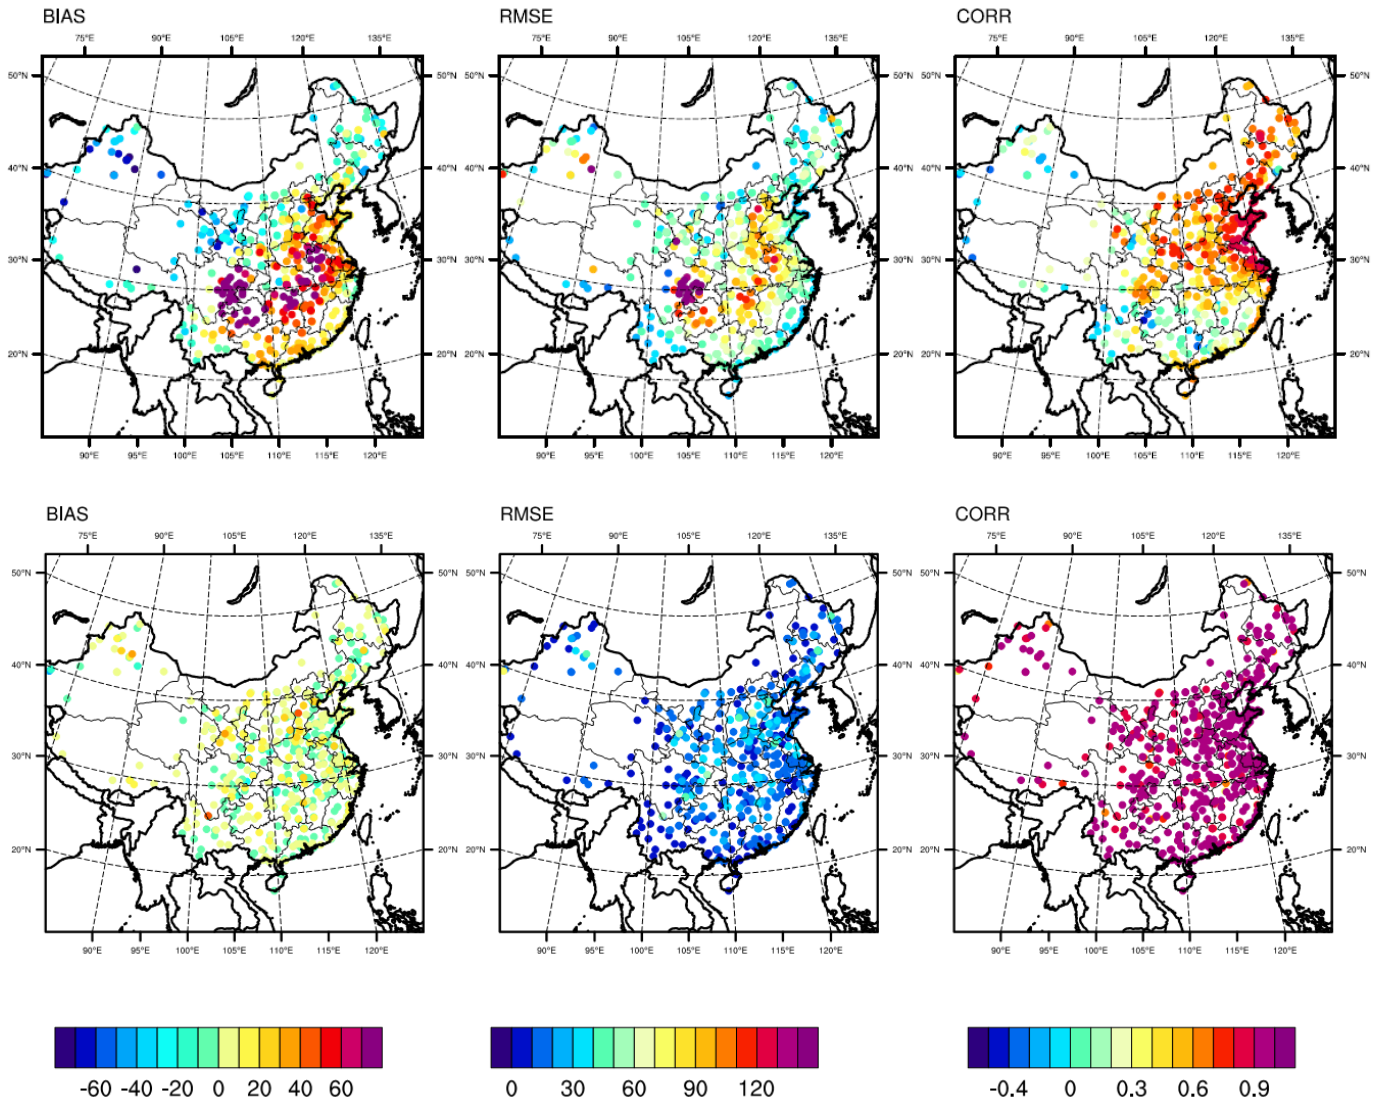

**Figure 5.** Spatial distributions of the statistics between the model simulations and observations for January 2015. Top: NO\_DA vs. observations, bottom: CONC\_DA vs. observations. BIAS-model minus observation, RMSE-root mean square error, CORR-correlation coefficient. (units are  $\mu\text{g m}^{-3}$  for BIAS and RMSE).



January 2016-2015

January 2017-2016

January 2017-2015

(a) Observations

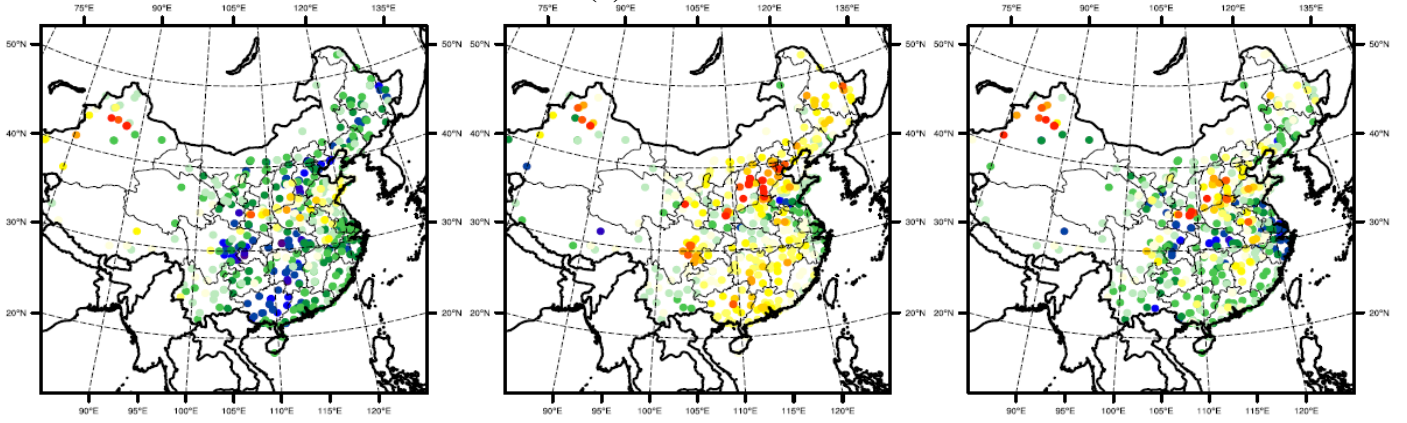

(b) Assimilated total changes

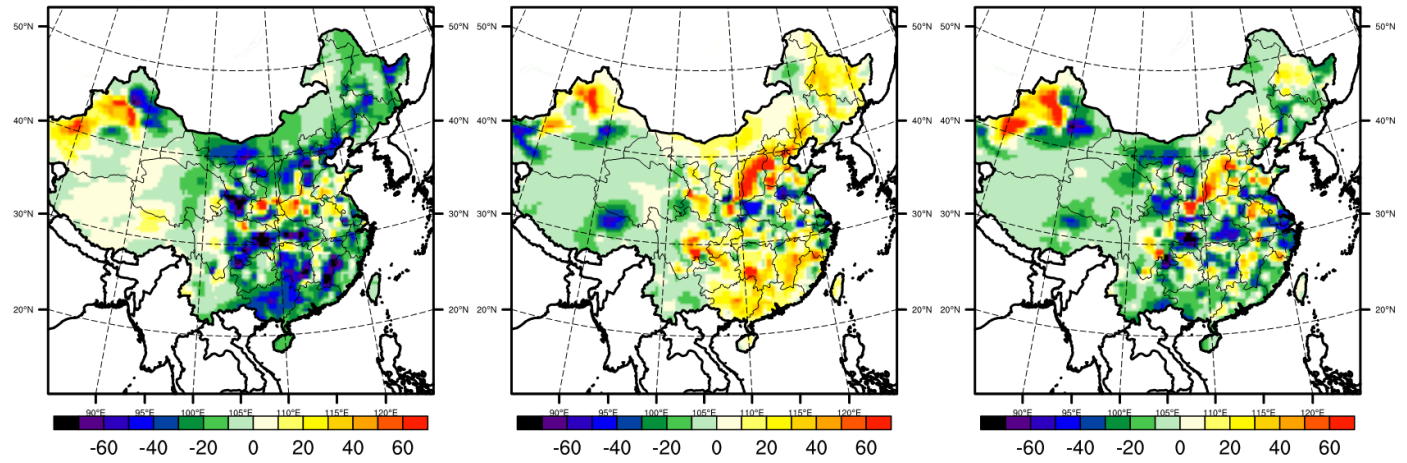

(c) Modeled changes due to meteorological conditions

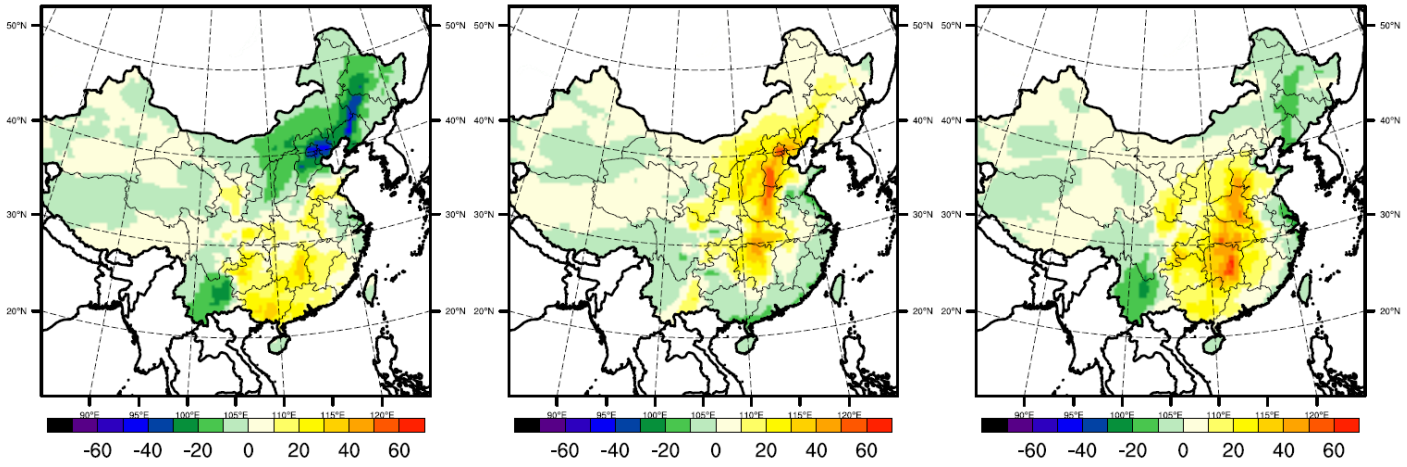

(d) Calculated changes due to emissions

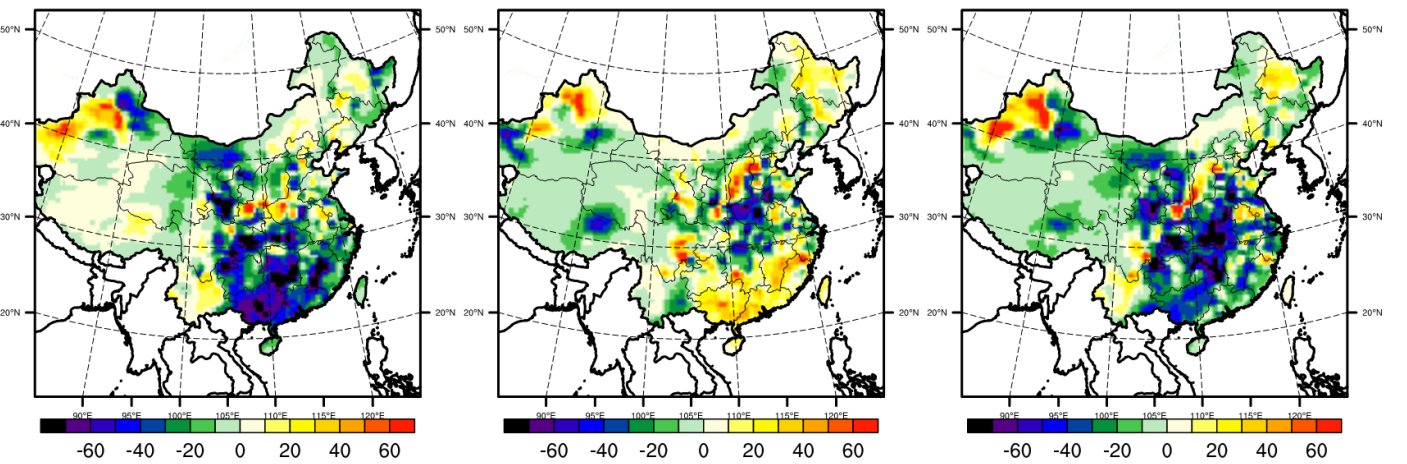

**Figure 6.** Observed and modeled ambient PM<sub>2.5</sub> concentration changes for 2016-2015 (left), 2017-2016 (middle) and 2017-2015 (right). (a) Observations, (b) assimilated total changes, (c) modeled changes due to meteorological conditions, (d) calculated changes due to emissions. (Units:  $\mu\text{g m}^{-3}$ )

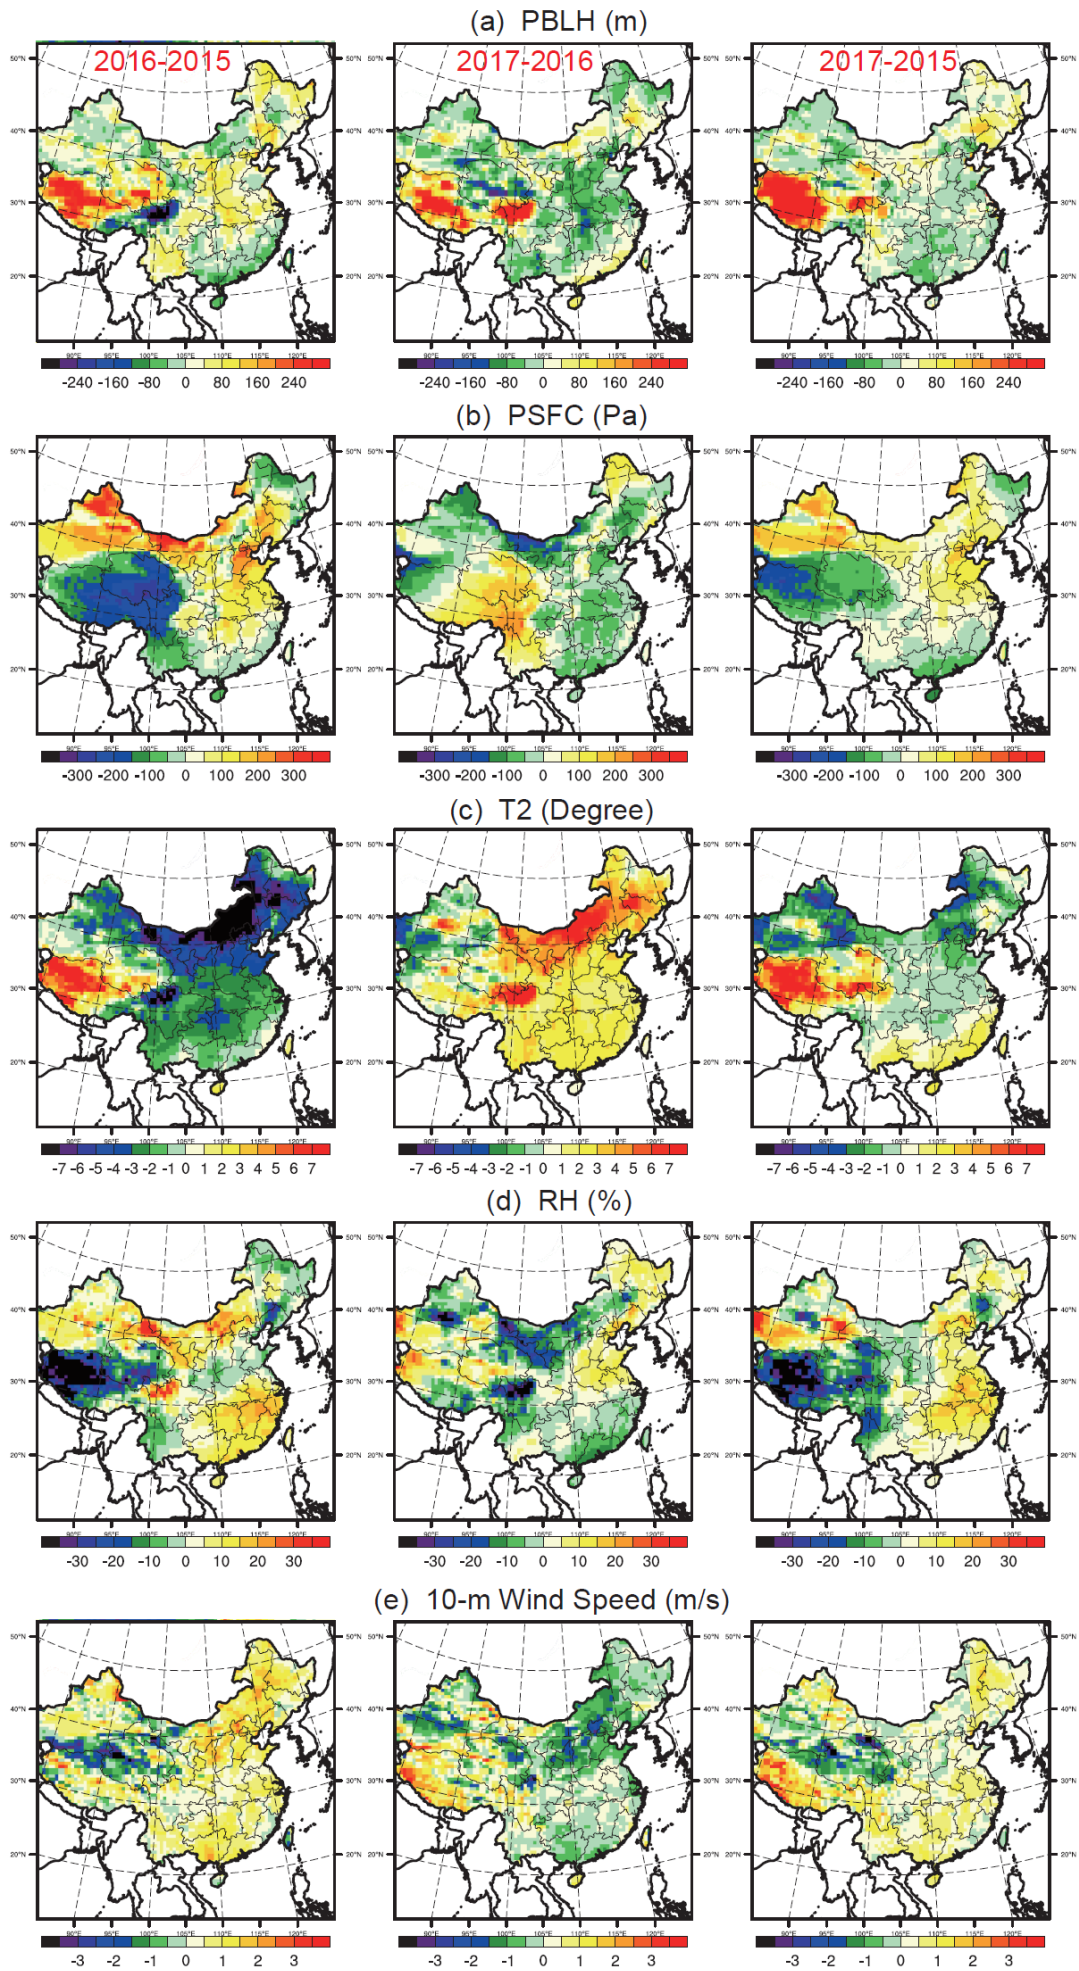

**Figure 7.** Modeled meteorological changes for 2016-2015 (left), 2017-2016 (middle) and 2017-2015 (right). (a) PBLH, (b) PSFC, (c) T2, (d) RH2 and (e) 10-m wind speed.

January 2016 - NO\_DA (top) and CONC\_DA (bottom)

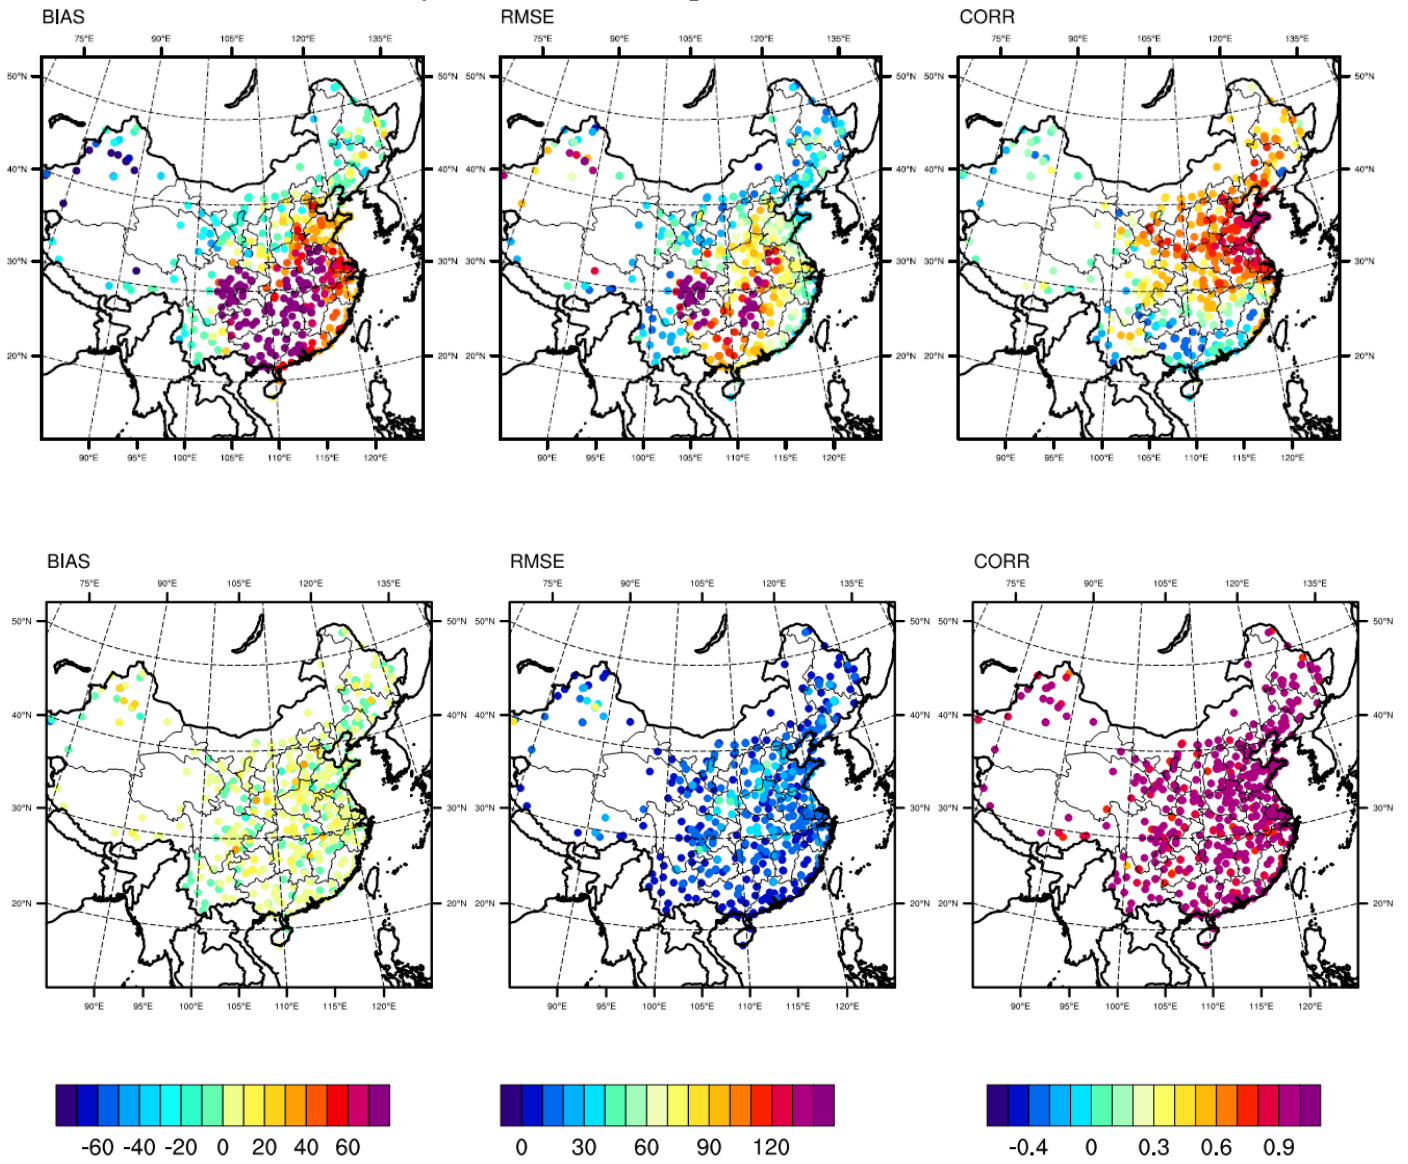

Supplemental Figure 1. Same as Figure 5 but for January 2016.

January 2017 - NO\_DA (top) and CONC\_DA (bottom)

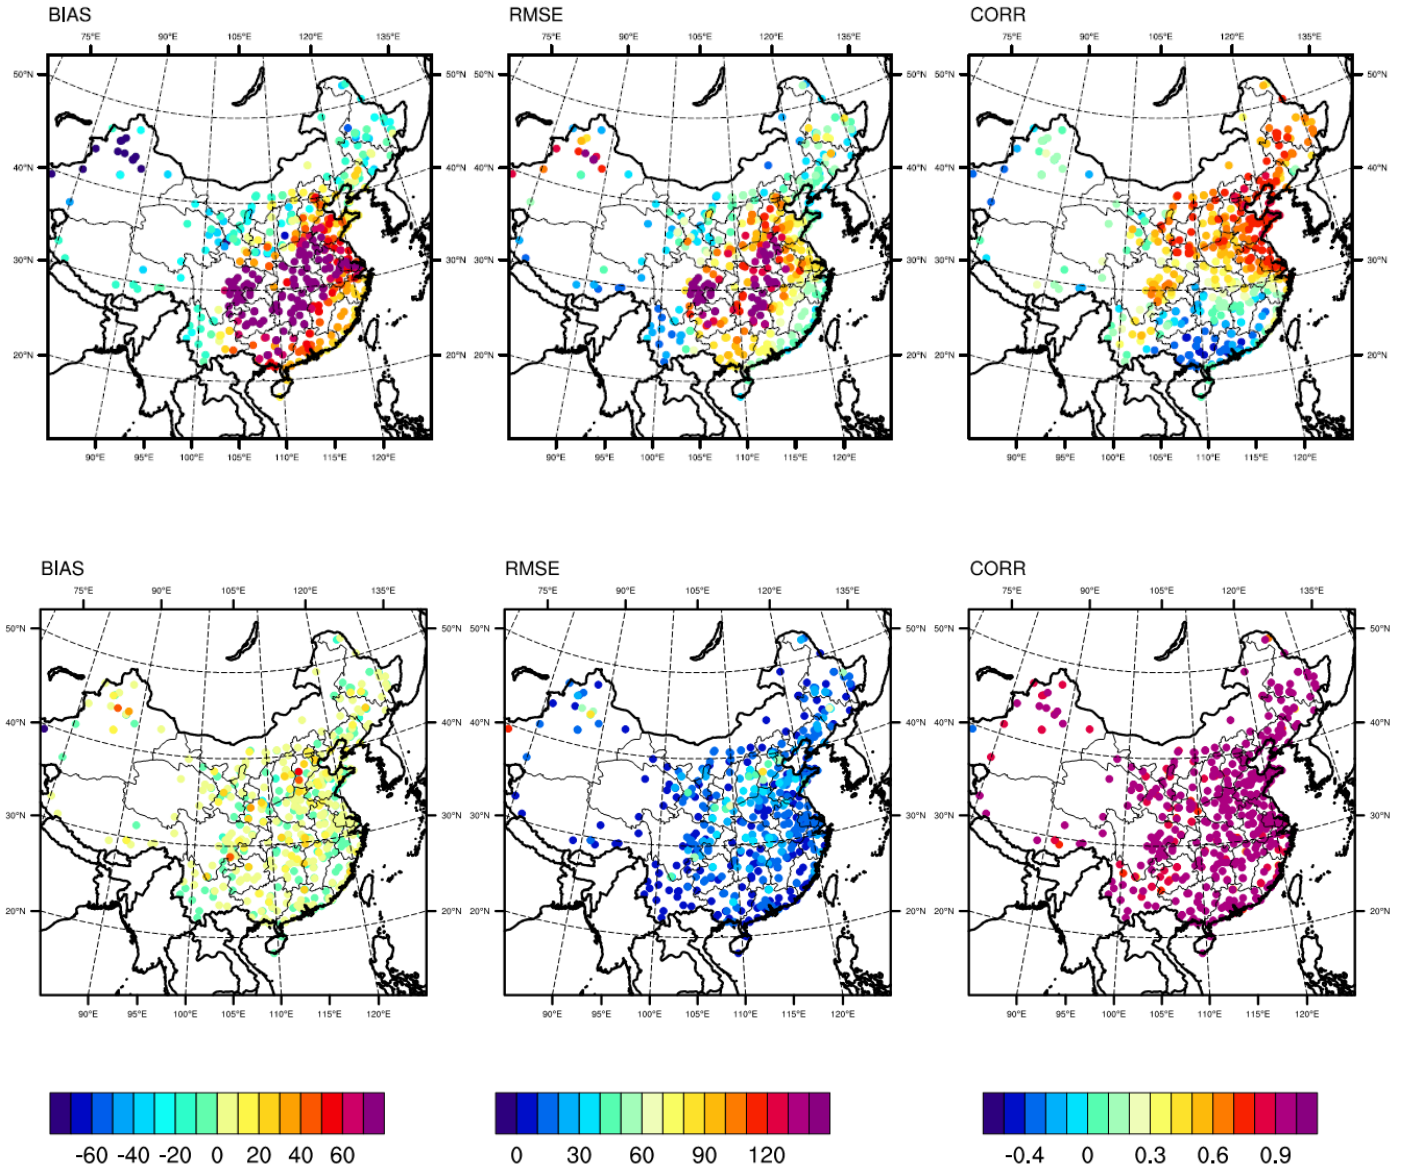

Supplemental Figure 2. Same as Figure 5 but for January 2017.
